# Supplementary material for: Measurement report: Size-resolved chemical characterisation of aerosols in low-income urban settlements in South Africa
Source: Copernicus journal article supplement (doi:10.5194/acp-2021-1026), 2022-02-16
Supplement: Supplementary file [file acp-2021-1026-RC1-supplement.pdf]

# Measurement report: Size-resolved chemical characterisation of aerosols in low-income urban settlements in South Africa

Constance K. Segakweng<sup>1</sup>, Pieter G. Van Zyl<sup>2\*</sup>, Cathy Liousse<sup>3</sup>, Johan P. Beukes<sup>2</sup>, Jan-Stefan Swartz<sup>2</sup>, Eric Gardrat<sup>3</sup>, Maria Dias-Alves,<sup>3</sup> Brigitte Language<sup>1</sup>, Roelof P. Burger<sup>1</sup>, Stuart J. Piketh<sup>1</sup>

<sup>1</sup> Unit for Environmental Sciences and Management, North-West University, Potchefstroom Campus, South Africa

<sup>2</sup> Chemical Resource Beneficiation, North-West University, Potchefstroom Campus, South Africa

<sup>3</sup> Laboratoire d'Aérologie, Université Paul Sabatier, Toulouse III, France

\*Corresponding author: PG van Zyl (Pieter.VanZyl@nwu.ac.za)

## Abstract

Naturally and anthropogenically emitted aerosols, which are determined by their physical and chemical properties, have an impact on both air quality and the radiative properties of the earth. An important source of atmospheric particulate matter (PM) in South Africa is household combustion for space heating and cooking, which predominantly occurs in low-income urban settlements. The aim of this study was to conduct a detailed size-resolved assessment of chemical characteristics of aerosols associated with household combustion through the collection of particulates in low-income urban settlements in South Africa in order to quantify the extent of the impacts of this type of atmospheric pollution within these settlements.

Outdoor (ambient) and indoor aerosols in different size fractions were collected during summer and winter in four low-income urban settlements located in the north-eastern interior on the South African Highveld. The mass concentration and chemical composition was determined for three size fractions, namely, PM<sub>1</sub>, PM<sub>2.5</sub> and PM<sub>2.5-10</sub>. The highest concentrations of particulates were measured indoors with the highest mass concentration determined in the indoor PM<sub>2.5-10</sub> (coarse) size fraction. However, the highest mass concentrations were determined in PM<sub>1</sub> in all outdoor aerosol samples collected during winter and summer, as well as in indoor samples collected during summer.

Significantly higher concentrations were determined for SO<sub>4</sub><sup>2-</sup> in outdoor and indoor particulates compared to other ionic species, with NH<sub>4</sub><sup>+</sup> and NO<sub>3</sub><sup>-</sup> being the second most abundant. SO<sub>4</sub><sup>2-</sup> and NH<sub>4</sub><sup>+</sup> almost exclusively occurred in the PM<sub>1</sub> size fraction, while NO<sub>3</sub><sup>-</sup>

was the major constituent in the larger size fractions. The highest  $\text{SO}_4^{2-}$  levels were recorded for the winter and summer outdoor campaigns conducted at Zamdela, while  $\text{NO}_3^-$  and  $\text{NH}_4^+$  concentrations were higher during the winter outdoor campaign. The combined concentrations of trace elements were higher for indoor particulates compared to outdoor aerosols, while the total trace element concentrations in  $\text{PM}_{10}$  were substantially higher than levels thereof in the two larger size fractions of particulates collected during all sampling campaigns.

No distinct seasonal trend was observed for the concentrations of trace elements. Na, Ca and Cr had the highest concentrations in particulates collected during outdoor and indoor sampling campaigns. Ni concentrations in outdoor and indoor aerosols exceeded the annual average European standard  $\text{PM}_{10}$  collected during all sampling campaigns in low-income urban settlements had the highest organic- and elemental carbon (OC and EC) concentrations. The highest OC and EC levels were determined in  $\text{PM}_{10}$  collected during the winter indoor campaign. OC and EC concentrations were highest during winter, which can be attributed to changes in meteorological patterns and increased household combustion during winter. Low OC/EC ratios determined for particulates collected in low-income urban settlements are indicative of OC and EC being mainly associated with local sources of these species. OC concentrations determined in this study were an order of magnitude lower than OC concentrations determined for ambient aerosols collected in the north-eastern interior of South Africa, while similar EC levels were measured. According to estimated dust concentrations, it was indicated that dust is the major constituent in all size ranges of particulates collected in this study, while trace elements were the second most abundant. However, trace elements made the highest contribution to indoor  $\text{PM}_{10}$  and  $\text{PM}_{10-2.5}$  mass. Mass concentrations and chemical concentrations determined for aerosols collected in low-income settlements reflect the regional impacts of anthropogenic sources in the north-eastern interior of South Africa, as well as the influence of local sources.

**Keywords:** inorganic ions; trace elements; organic carbon; elemental carbon; mass closure; air quality

## 1 Introduction

Atmospheric aerosols or particulate matter (PM) are either emitted into the atmosphere directly as primary aerosols by anthropogenic activities (e.g. incomplete combustion of fossil fuels, vehicular traffic, industrial processes and household combustion) and natural (e.g. volcanic eruptions, sea salts and wind-blown dust) sources, or form in the atmosphere as secondary aerosols. (Pöschl, 2005). The environmental impacts of atmospheric aerosols are mainly related to climate change and air quality, which include direct and indirect effects on cooling/warming of the atmosphere, as well as adverse influences on human health, especially, related to respiratory diseases (Guinot et al., 2007).

The impacts of atmospheric PM on health and radiative forcing are determined by their physical (e.g. size, mass, optical density) and chemical properties. Larger particles can, for instance, be filtered in the nose and throat, while smaller particles can penetrate through the gas-exchange sections of the lungs and affect other organs (Pope and Burnett, 2002). In addition, the chemical composition of aerosols can influence radiative forcing since lighter coloured aerosols (e.g. sulphate,  $\text{SO}_4^{2-}$ ) reflect incoming solar radiation causing net cooling of the atmosphere, while darker absorbing particulates (e.g. black carbon) contribute to warming of the atmosphere. PM is typically classified according to size fractions, which include coarse (aerodynamic diameter 2.5-10  $\mu\text{m}$ ,  $\text{PM}_{10-2.5}$ ), fine (aerodynamic diameter 1-2.5  $\mu\text{m}$ ,  $\leq\text{PM}_{2.5-1}$ ) and ultrafine particulates (aerodynamic diameter  $<1 \mu\text{m}$ ,  $\text{PM}_1$ ) (Venter et al., 2017; Pope & Dockery, 2006; Seinfeld & Pandis, 2006). Atmospheric aerosols comprise numerous organic and inorganic compounds, which also influences their physical characteristics. Many studies have been conducted to chemically characterise atmospheric aerosols from various sources in order to reduce uncertainties associated with their impacts (Sciare et al., 2005; Kulmala et al., 2011).

Inorganic species in PM include trace elements and inorganic ions, while organic species are generally categorised into organic – and elemental carbon (OC and EC, respectively). The major inorganic ionic species generally considered include  $\text{SO}_4^{2-}$ , nitrate ( $\text{NO}_3^-$ ), ammonium ( $\text{NH}_4^+$ ), sodium ( $\text{Na}^+$ ), potassium ( $\text{K}^+$ ), chloride ( $\text{Cl}^-$ ), calcium ( $\text{Ca}^{2+}$ ), magnesium ( $\text{Mg}^{2+}$ ) and fluoride ( $\text{F}^-$ ) (Venter et al., 2017; Ibrahim & Habbani, 2013; Pöschl, 2005). These inorganic ions in atmospheric PM have a significant influence on the acidity potential of the atmosphere, which will also have an impact on ecological systems through the wet and dry deposition (Conradie et al., 2016). Atmospheric aerosols comprise various trace elements,

which include sodium (Na), silicon (Si), magnesium (Mg), aluminium (Al), potassium (K), calcium (Ca), titanium (Ti), chromium (Cr), manganese (Mn), iron (Fe), arsenic (As), barium (Ba), cadmium (Cd), copper (Cu), nickel (Ni), zinc (Zn), vanadium (V), molybdenum (Mo), mercury (Hg) and lead (Pb) (Adgate et al., 2007; Pacyna, 1998). Atmospheric PM also comprise a large number of organic compounds (Goldstein and Galbally, 2007), which are generally reported as a collective due to the complexities associated with identifying individual organic compounds (Chiloane et al., 2017; Maritz et al., 2019; Booyens et al., 2014). Detailed chemical characterisation of atmospheric aerosols allows for chemical mass closure, which is an important tool in establishing major sources and impacts of these species, as well as chemical transformation processes involved on local, regional and global scales (Guinot et al., 2007; Sciare et al., 2005).

South Africa has one of the largest industrialised economies in Africa with significant industrial, mining and agricultural activities (Josipovic et al., 2019), while being regarded a significant source region of atmospheric pollutants (Venter et al., 2017). In addition, coal-fired power stations produce > 90% of the electricity in South Africa, while seasonal open biomass burning (wildfires) also has a large impact on air quality in this region (Vakkari et al., 2014). An important source of atmospheric pollutants in South Africa revealed through various studies is household combustion for space heating and cooking predominantly occurring in low-income urban settlements (e.g. Venter et al., 2012; Chiloane et al., 2017; Maritz et al., 2019; Laban et al., 2018). Most households in these settlements use low-grade fuels such as coal or wood to meet their energy demands (Adesina et al., 2020; Xulu et al., 2020). These practises contribute significantly to emissions of atmospheric pollutants on a local and regional scale, while serious health risks associated with indoor and outdoor exposure are posed for people within these communities (Language et al., 2016; Xulu et al., 2020). Several studies have shown that indoor air pollution often dominates human exposure in these settlements to atmospheric pollutants, since health effects are not only determined by air pollution levels, but also by the extent of exposure, i.e. the time spent within proximity of polluted air. (Manisalidis et al., 2020; Bruce et al., 2000). In addition to household combustion, waste burning within these settlements also contributes to poor ambient air quality in these low-income communities (Language et al., 2016).

In this study, an assessment of the chemical characteristics of aerosol species in different size fractions, namely, ( $PM_{10}$ ,  $PM_{1-2.5}$ ,  $PM_{2.5-10}$ ) in low-income urban settlements in South Africa is conducted. The concentrations of particulate inorganic ions, trace elements, as well as OC

and EC, were determined in order to better understand the importance of the sources contributing to the various chemical species in these settlements.

## **2 Experimental**

### **2.1 Site descriptions**

Aerosol samples were collected at four low-income urban settlements located in the north-eastern interior on the South African Highveld, i.e. Kwadela (S -26.463200 E 29.663124), Kwazamokuhle (S -26.138252, E 29.738953), Zamdela (S -26.8373100, E 27.843500) and Jouberton (S -26.906231, E 26.584010) as indicated in Figure 1. This is the largest industrialised area in South Africa, with this region holding several pyrometallurgical industries, mines, coal dumps, two large petrochemical plants and a cluster of coal-fired power stations (11 of 13 South African coal-fired power stations are located in this region) (Laban et al., 2018). In addition, this area is also influenced by large scale seasonal open biomass burning (wildfires) during the dry season (Vakkari et al., 2014), while household combustion is also an important source of atmospheric pollutants in this relatively densely populated area (Chiloane et al., 2017; Laban et al., 2018). Measurements at Kwadela, Kwazamokuhle and Zamdela were conducted within the framework of the air quality offset programme, which is a legal measure introduced by the South African government whereby industries receive leniency from complying with emission standards by reducing ambient pollution levels through interventions in low-income urban settlements (Langerman et al., 2018). Aerosols sampled at Jouberton were part of the Prospective Household cohort study of Influenza, Respiratory Syncytial virus and other respiratory pathogens community burden and Transmission dynamics in South Africa (PHIRST) (NICD, 2018).

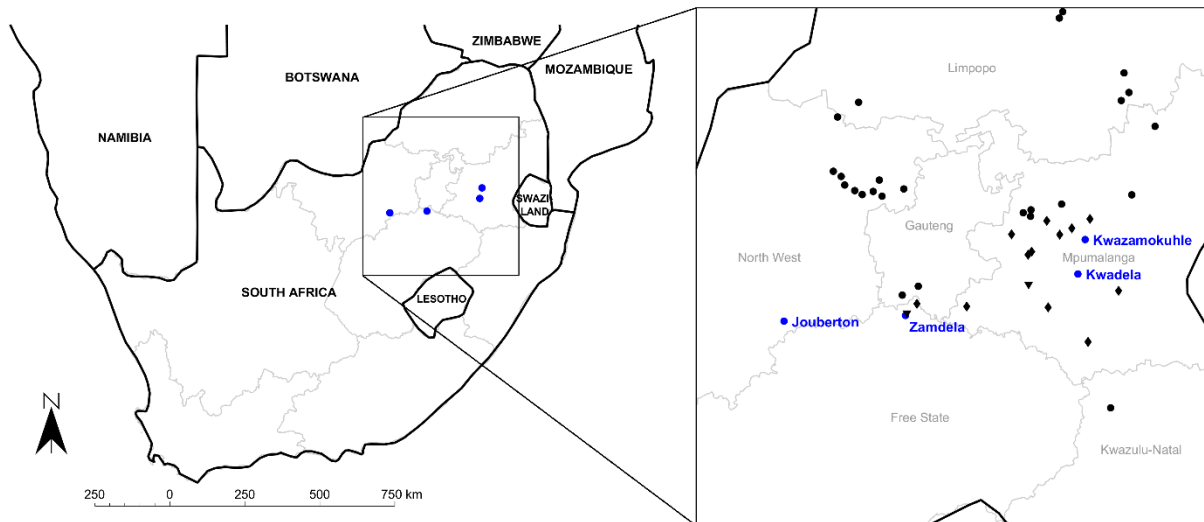

**Figure 1:** Map of South Africa indicating the location of the four low-income urban settlements and major large point sources within the north-eastern interior.

The South African Highveld is characterised by a distinct dry and wet season with the dry season typically occurring from mid-May to mid-October, which coincides with the South African winter from June to August. More pronounced inversion layers and increased anticyclonic recirculation of air masses during winter traps pollutants near the surface causing, in conjunction with reduced wet scavenging, pollution build-up over this region during this period (Tyson and Preston-Whyte, 2000). In addition, the winter months are also characterised by increased household combustion for space heating and cooking, while seasonal open biomass burning generally occurs in the period from August to October, typically peaking during spring in September (Laban et al., 2018). Furthermore, the removal rate of atmospheric pollutants associated with precipitation is also reduced during the dry season (Venter et al., 2018).

Kwadela is situated in the Mpumalanga Province, between the towns Ermelo and Bethal, approximately 180 km east-south-east of the Johannesburg-Pretoria conurbation (Figure 1). In addition to being influenced by regional air pollution, this low-income settlement is also exposed to traffic emissions from the nearby (~500 m) N17 national highway. Kwazamokuhle is located near the town Hendrina in the Mpumalanga Province, approximately 150 km east of the Johannesburg-Pretoria conurbation (Figure 1). This low-income settlement is located within proximity of three large coal-fired power stations, i.e. Arnot-, Komati- and Hendrina power station as indicated in Figure 1. Zamdela is situated on

the south banks of the Vaal River in proximity of the town Sasolburg in the Free State Province in the densely populated and highly industrialised Vaal Triangle region (Figure 1). Sources within this region include a large petrochemical plant, a coal-fired power station and a number of pyrometallurgical smelters (Conradie et al., 2016). Jouberton is a low-cost urban settlement nearby the town Klerksdorp in the North West Province as indicated in Figure 1 (approximately 180 km south-west of the Johannesburg-Pretoria conurbation). Main anthropogenic activities in this region of South Africa are related to large mining industries and agriculture, while this area is also impacted by regional air pollution associated with the north-eastern interior as indicated by several studies at the Welgegund atmospheric monitoring site approximately 80 km east of Klerksdorp (e.g. Booyens et al., 2014; Venter et al., 2017).

## **2.2 Sample collection**

All aerosol samples in this study were collected using a set of three 5-stage cascade sioutas impactors (Josipovic et al., 2019), each connected to a pump and running in parallel at a flow rate of 9L/min. These impactors allowed for the collection of PM in the 2.5 – 10  $\mu\text{m}$ , 1.0 – 2.5 $\mu\text{m}$ , 0.50 – 1.0 $\mu\text{m}$ , 0.25 – 0.50 $\mu\text{m}$  and <0.25 $\mu\text{m}$  aerodynamic diameter size ranges. One impactor was equipped with Teflon filters for the determination of inorganic ions, water-soluble organic acids and trace elements, the second impactor with quartz filters for OC and EC analysis, and the third impactor was loaded with Nucleopore filters for the health tests. The latter was beyond the scope of this paper and is not discussed further. 25 mm filters and 37 mm back filters were used in each impactor. 72-hour outdoor (ambient) aerosol samples were collected during two-week periods, while 24-hour indoor PM samples were collected for a duration of seven days. These sampling times were chosen in order to collect sufficient amounts of PM for chemical analysis. Filters were placed in petri dishes after sampling, which were sealed and stored in a freezer until they were analysed. A five-decimal Mettler Toledo microbalance was used to weigh filters prior to and after sampling.

Outdoor aerosol samples collected during the three summer campaigns allowed for a spatial assessment of outdoor aerosol characteristics associated with low-income urban settlements located in the north-eastern interior of South Africa, while the one winter campaign at Zamdela was considered indicative of temporal variability associated with outdoor aerosols in these settlements. Indoor measurements conducted at Jouberton through a summer and winter campaign allowed for comparison between outdoor and indoor aerosol characteristics.

In spite of the above-mentioned challenges associated with sampling in low-income settlements in South Africa, the results presented in this paper can be considered a good representation of chemical composition of aerosols in these settlements.

At Kwadela, outdoor aerosol measurements were conducted at Kwadela Primary School from 30 March to 14 April 2015. Outdoor aerosol samples were collected inside the church yard at Kwazamokuhle (same site where compliance air quality monitoring is being conducted) from 23 February until 07 March 2016. Measurements at Zamdela were conducted at the Theha Setjhaba primary school. The summer sampling campaign at Zamdela was conducted from 09 to 23 March 2017, while the winter campaign occurred from 15 to 30 July 2016. The summer and winter indoor sampling campaigns at Jouberton were performed at three houses from 18 April to 19 May 2016 and 01 August 2016 to 16 August 2016, respectively. Although these three houses were electrified, paraffin was also burned as an alternative source of energy. Sampling was only conducted at two of the three houses during the winter indoor campaign, due to logistical restraints. In addition, instrument failure contributed to one of the sioutas not being available for sampling during the winter sampling campaign at Jouberton. It was decided to use the two available sioutas to collect PM samples for OC and EC analysis, as well as the health tests during this campaign. These summer sampling periods can be considered representative of summer, since a recent study indicated that October to March can be classified as summer months in South Africa (Van der Walt and Fitchett, 2020).

In total, 134 aerosol samples were collected for this study, which included 43 outdoor samples at Kwadela (9), Kwazamokuhle (12) and Zamdela (24), while 91 indoor samples were collected at Jouberton.

## **2.3 Chemical analyses**

### **2.3.1 Inorganic ions and water-soluble organic acids**

Similar to the method described by Van Zyl et al., (2014), Venter et al., (2014) and Venter et al., (2017), sampled Teflon filters were divided into two halves by a specially designed punch to allow for the analyses of trace elements, as well as inorganic ions and water-soluble organic acids. Inorganic ions and water-soluble organic acids in the collected PM samples were extracted with 5 or 10 mL (depending on sample load) deionised water (resistivity  $\approx$



18.2 MΩ) in an ultrasonic bath for 30 min. The extracted aqueous samples were then analysed by suppressed conductivity with a Dionex ICS 3000 ion chromatograph (IC), with an IonPac AS18 (2 mm x 50 mm) analytical column and IonPac AG18 (2 mm x 50 mm) guard column. Inorganic ionic species determined include  $\text{SO}_4^{2-}$ ,  $\text{NO}_3^-$ ,  $\text{Cl}^-$ ,  $\text{F}^-$ ,  $\text{Na}^+$ ,  $\text{NH}_4^+$ ,  $\text{K}^+$ ,  $\text{Mg}^{2+}$ , and  $\text{Ca}^{2+}$ , while water-soluble organic acids (OA) include formic- ( $\text{COO}^-$ ), acetic- ( $\text{CH}_3\text{COO}^-$ ), propionic- ( $\text{C}_2\text{H}_5\text{COO}^-$ ) and oxalic acid ( $\text{C}_2\text{O}_4^{2-}$ ). Standard stock solutions for each ionic species analysed were obtained from Industrial Analytical. The detection limits (DL) of each of these species are presented in Table 1 below.

**Table 1.** DLs (ppb) of inorganic ions and water-soluble organic acids determined in this study

| $\text{SO}_4^{2-}$ | $\text{NO}_3^-$           | $\text{Cl}^-$                      | $\text{F}^-$                | $\text{Na}^+$ | $\text{NH}_4^+$ | $\text{K}^+$ | $\text{Mg}^{2+}$ | $\text{Ca}^{2+}$ |
|--------------------|---------------------------|------------------------------------|-----------------------------|---------------|-----------------|--------------|------------------|------------------|
| 5,699              | 52,581                    | 17,456                             | 10,750                      | 33,584        | 20,128          | 27,244       | 21,047           | 18,718           |
| $\text{COO}^-$     | $\text{CH}_3\text{COO}^-$ | $\text{C}_2\text{H}_5\text{COO}^-$ | $\text{C}_2\text{O}_4^{2-}$ |               |                 |              |                  |                  |
| 18,202             | 28,147                    | 15,73                              | 17,242                      |               |                 |              |                  |                  |

### 2.3.2 Trace elements

The other halve of the sampled Teflon filter was subjected to hot acid leaching (Mouli et al., 2006), which entailed placing the filter in a 100 mL Erlenmeyer flask with 20 mL concentrated  $\text{HNO}_3$  and 40 mL deionised water. The mixture was boiled for 5 min and then refluxed for three hours after the addition of 5 mL concentrated  $\text{HCl}$ . The extract was cooled and then diluted in 100 mL deionised water for subsequent analysis with an Agilent 7500c inductively coupled plasma mass spectrometer (ICP-MS). In total, 35 trace elements could be detected, which included Be, B, Na, Mg, Al, P, K, Ca, Ti, V, Cr, Mn, Fe, Cu, Co, Ni, Zn, As, Se, Rb, Sr, Mo, Pd, Ag, Cd, Sb, Ba, Pt, Au, Hg, Tl, Pb, Bi, Th and U. Trace element concentrations below the DL of the ICP-MS (DLs listed in Table 2) were considered to have concentrations of half the detection limit of the species considered, which is a precautionary assumption that is commonly used in health-related environmental studies (e.g. Van Zyl et al., 2014). Be and Tl levels were below the detection limit of the analytical technique in all three size fractions for particulate samples collected during all sampling campaigns, while concentrations of Cd, Sb, Ba, Cu, As, Se, Rb, Sr, Mo, Pd, Ag, Pb, Au, Hg, Ti, Co, Pt, Bi, Th and U were very low, and below the detection limit in 75% or more collected samples. Similarly to inorganic ions and water-soluble OAs, trace element concentrations could also not be determined during the winter indoor campaign.

**Table 2.** DLs (ppb x 10<sup>-2</sup>) of trace elements determined in this study

|       |       |       |       |       |       |       |       |       |       |       |       |       |       |
|-------|-------|-------|-------|-------|-------|-------|-------|-------|-------|-------|-------|-------|-------|
| Be    | B     | Na    | Mg    | Al    | P     | K     | Ca    | Ti    | V     | Cr    | Mn    | Fe    | Co    |
| 1,165 | 19,04 | 29,58 | 22,09 | 65,07 | 377,3 | 406,9 | 93,2  | 1,432 | 4,466 | 359,9 | 4,156 | 60,72 | 0,625 |
| Ni    | Cu    | Zn    | As    | Se    | Rb    | Sr    | Mo    | Pd    | Ag    | Cd    | Sb    | Ba    | Pt    |
| 3,229 | 4,186 | 6,212 | 5,686 | 8,559 | 0,268 | 1,238 | 0,681 | 0,246 | 2,447 | 1,119 | 0,712 | 1,670 | 0,381 |
| Au    | Hg    | Tl    | Pb    | Bi    | Th    | U     |       |       |       |       |       |       |       |
| 2,156 | 2,836 | 0,411 | 0,587 | 0,309 | 0,160 | 0,113 |       |       |       |       |       |       |       |

### 2.3.3 Carbonaceous aerosol

OC and EC concentrations were determined from aerosols collected pre-fired on quartz filters with a two-step thermal procedure developed by Cachier et al., (1989) at the Laboratoire d'Aerologie. This procedure entailed halving the filters with one part of the filter heated in a pre-combustion oven under pure oxygen for two hours at a relatively low temperature (340°C) to drive off all OC, after which the sample was oxidised in order to determine EC content with a G4 ICARUS carbon analyser equipped with a non-dispersive infrared detector (NDIR). The other part of the filter was directly analysed for total carbon content with the carbon analyser (Adon et al., 2020). OC content could then be obtained from the difference between the measured TC and EC concentrations. The detection limit for OC/EC analysis was 2 µgC.cm<sup>-2</sup>.

## 3. Results and discussion

### 3.1 Mass concentration

The mass concentrations determined for the PM<sub>1</sub>, PM<sub>1-2.5</sub> and PM<sub>2.5-10</sub> size fractions, as well as for PM<sub>10</sub> (combination of mass concentrations of the three size fractions) at each site during the different sampling campaigns are presented in Figure 2 (S denotes a summer campaign, while W designates a winter campaign). It is evident from Figure 2 that indoor PM<sub>2.5-10</sub> samples collected during winter at Jouberton had the highest mean mass concentration (59.6 µg.m<sup>-3</sup>), while the highest average PM<sub>10</sub> mass concentration was also recorded during this sampling campaign (108.3 µg.m<sup>-3</sup>). Moderately lower mean PM mass concentrations were determined during the summer indoor campaign in comparison to the winter indoor campaign. In general, PM mass concentrations were higher for indoor samples compared to aerosol mass concentrations determined for outdoor samples. Average PM mass concentrations determined for outdoor samples collected during winter at Zamdela were

moderately lower than the mean aerosol mass concentration determined during the summer indoor campaign, while being higher (with higher mean mass concentrations in each size fraction) than average PM mass concentrations measured during the three summer outdoor campaigns for which similar mean aerosol mass concentrations were recorded.

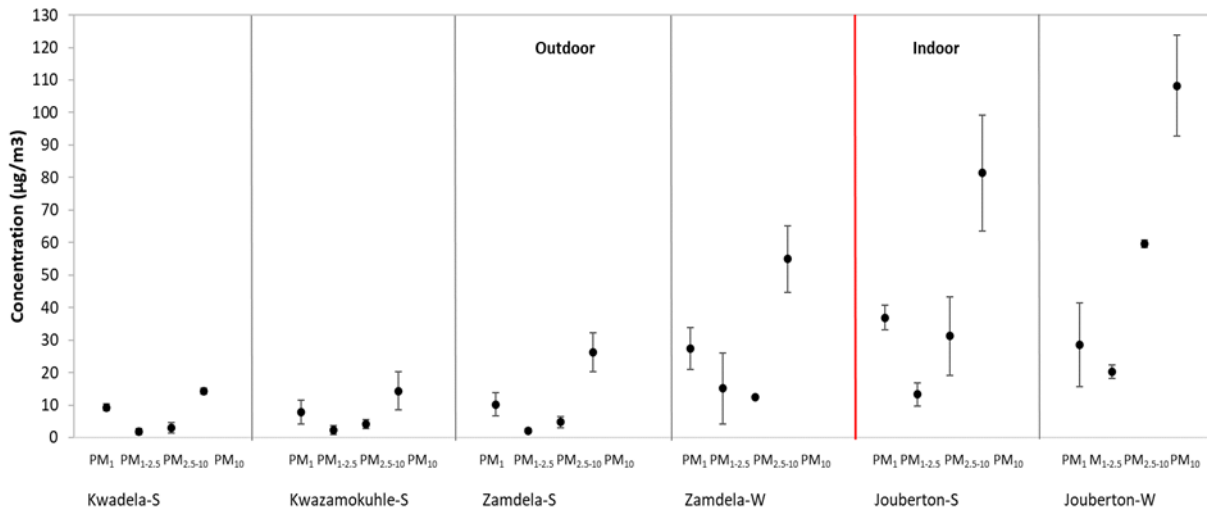

**Figure 2:** Mean aerosol mass concentrations ( $\pm$  standard deviation) measured in PM<sub>1</sub>, PM<sub>1-2.5</sub> and PM<sub>2.5-10</sub> at each site (S denotes a summer campaign, while W designates a winter campaign). Average PM<sub>10</sub> mass concentrations are also indicated

The PM mass concentrations determined in this study correspond to levels determined for PM in other recent studies in low-income settlements, which also include measurements at Kwadela and Kwazamokuhle (Adesina et al., 2020; Langerman et al., 2018; Xulu et al., 2020; Language et al., 2016; Kapwate et al., 2018). These studies also reported similar trends in PM mass concentrations, i.e. higher mass concentrations in winter compared to summer, while indoor PM mass concentration were also generally higher (in some instances significantly higher) than outdoor mass concentrations. As mentioned above (Section 2.1), higher concentrations of pollutant species in winter in this part of South Africa can be attributed to pollution build-up associated with meteorological conditions and increased household combustion for space heating.

Comparison of aerosol mass concentrations of different size fractions indicates that the PM<sub>1</sub> size fraction had the highest mass concentration in all outdoor aerosol samples collected during winter and summer, as well as in indoor samples collected during summer. However, higher mass concentration was observed for the PM<sub>2.5-10</sub> size fraction of summer indoor

samples, while the  $PM_{2.5-10}$  size fraction had the highest mass concentration for indoor samples collected during winter as mentioned above. The lowest mass concentrations were determined for the  $PM_{1-2.5}$  size fractions during all the sampling campaigns at all the sites, with the exception of winter outdoor samples collected at Zamdela where the  $PM_{2.5-10}$  size fraction had the lowest mass concentration. Ultrafine PM is indicative of secondary aerosol formation, while coarse particulates is generally associated with terrigenous sources (e.g. wind-blown dust). These mass concentration profiles observed for the size fractions of aerosols collected during each sampling campaign in this study will be explored in subsequent sections through assessment of the size-resolved chemical composition of PM.

### 3.2 Inorganic ions and water-soluble organic acids

In Figure 3, the concentrations of each ionic species determined in the three size fractions at each site during the respective sampling campaigns are presented, while Figure 4(a) presents the concentrations of each of these ionic species for  $PM_{10}$  and Figure 4(b) presents the normalised concentration distribution of each of these ionic species in the three size fractions. Concentrations of  $COO^-$ ,  $CH_3COO^-$ ,  $C_2H_5COO^-$  and  $C_2O_4^{2-}$  were combined and presented as a total for water-soluble OA (Conradie et al, 2016). As mentioned previously (Section 2.1), inorganic ions and water-soluble OAs were not determined during the winter indoor campaign at Jouberton due to instrument failure.

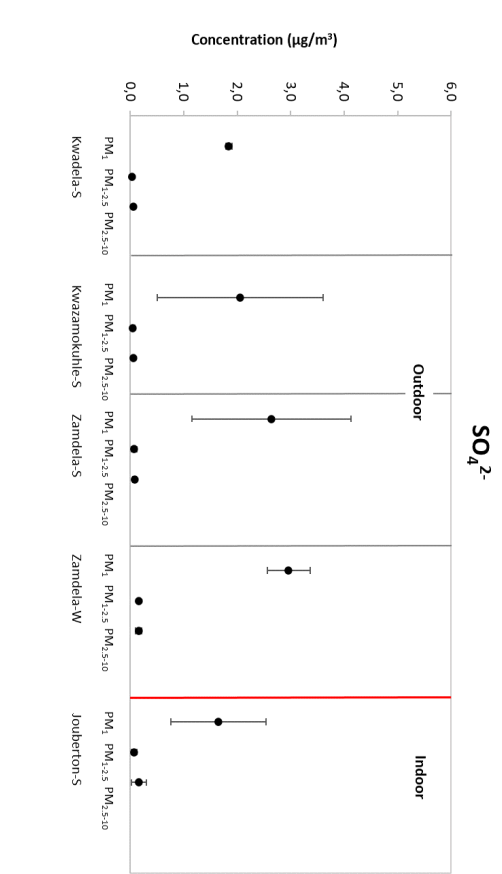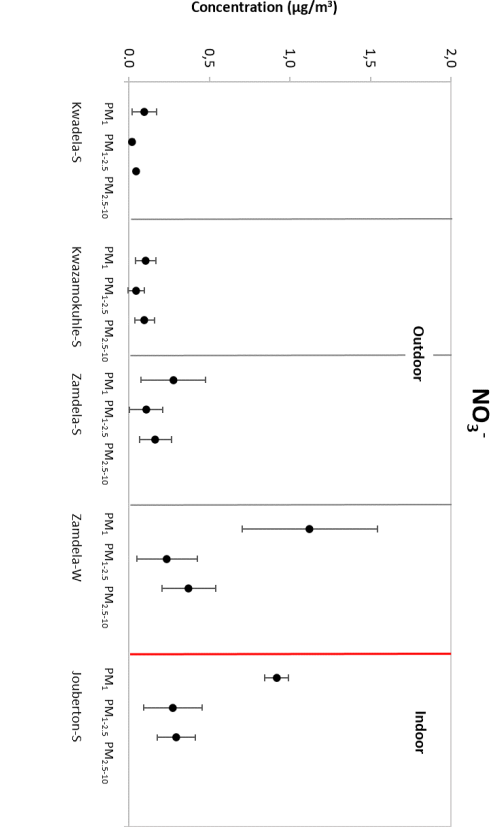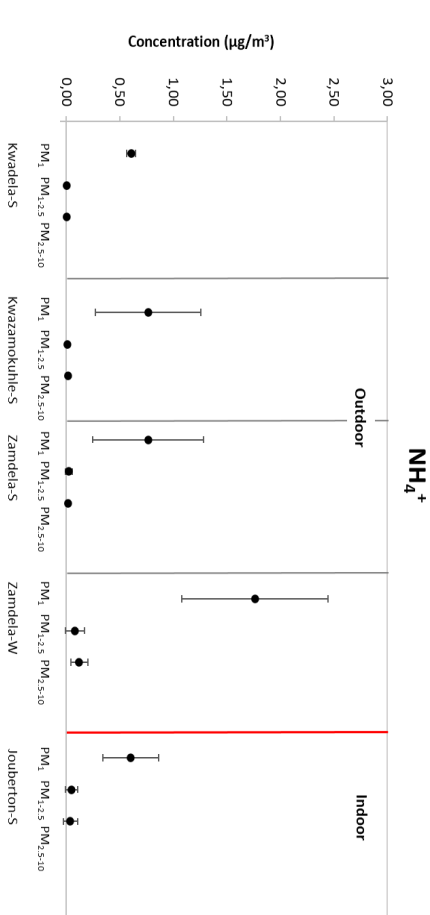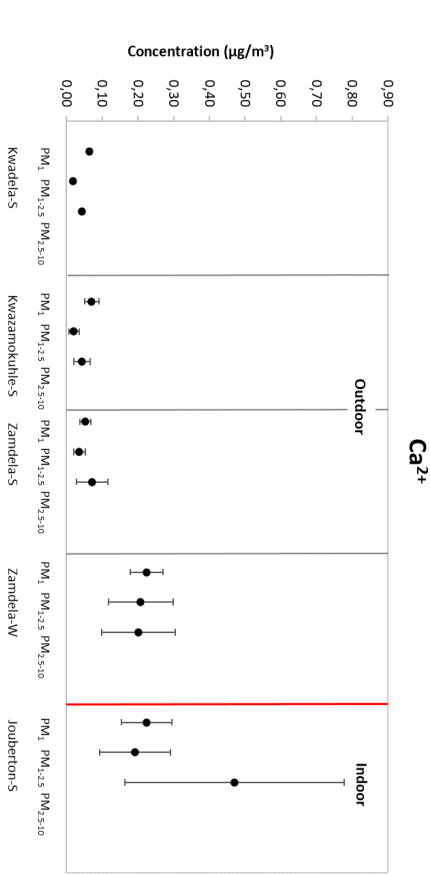

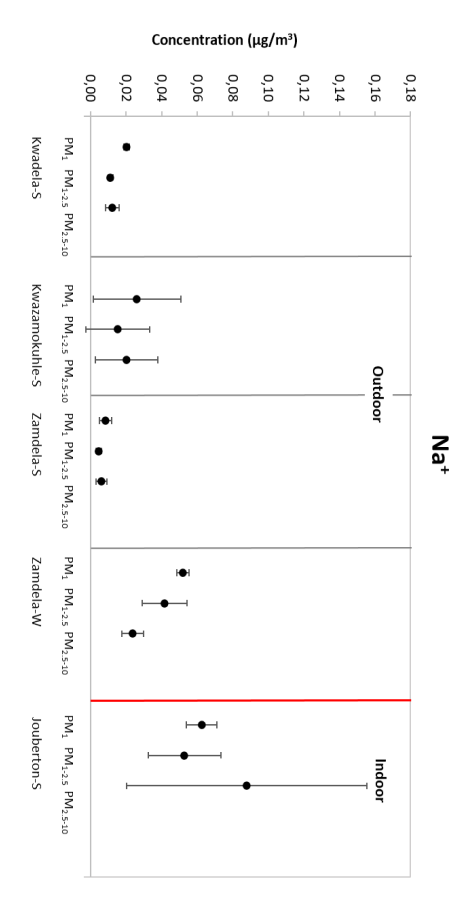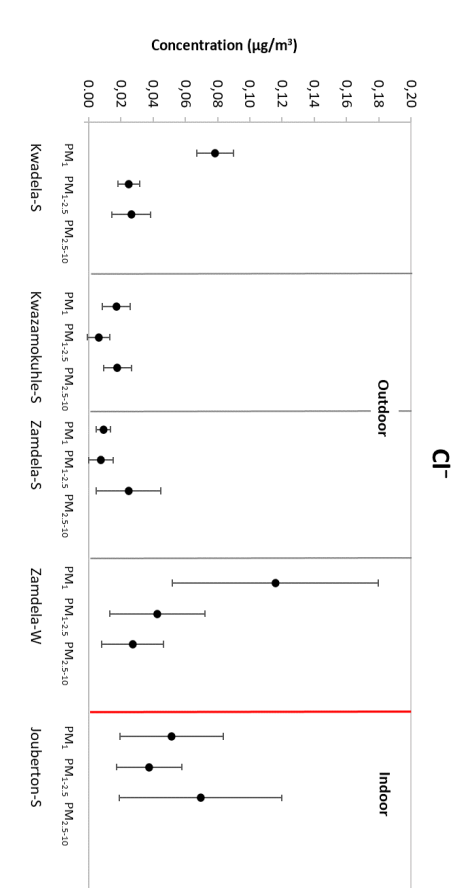

**K<sup>+</sup>**

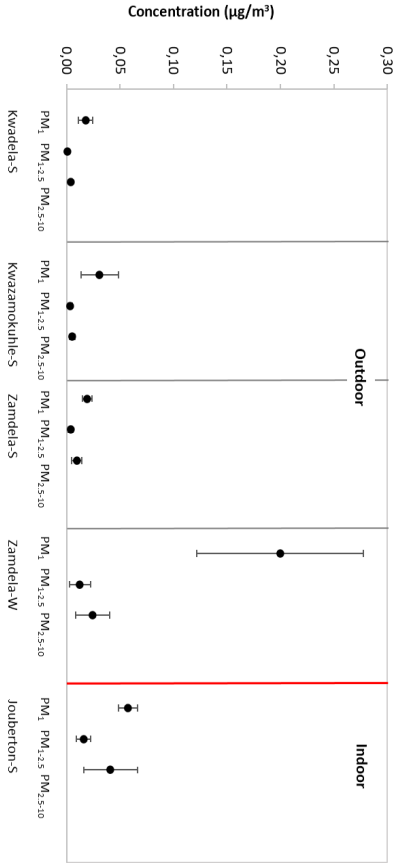

**OA**

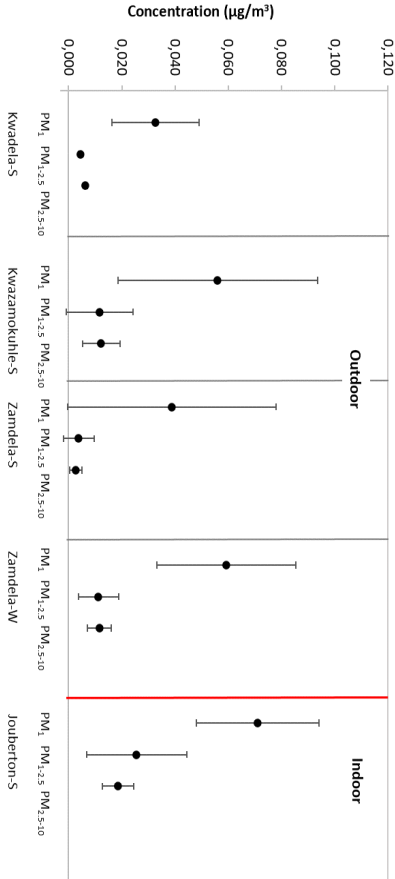

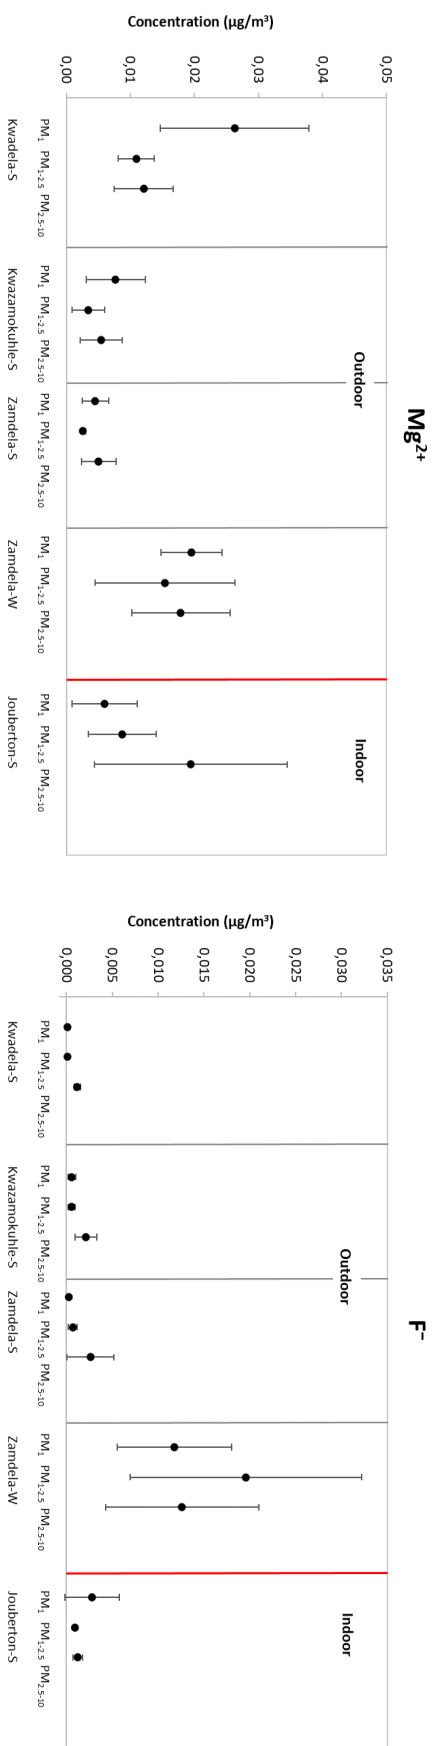

**Figure 3:** Mean concentrations ( $\pm$  standard deviation) of inorganic ionic species and water-soluble OAs measured in PM<sub>1</sub>, PM<sub>1-2.5</sub> and PM<sub>2.5-10</sub> at each site during respective sampling campaigns

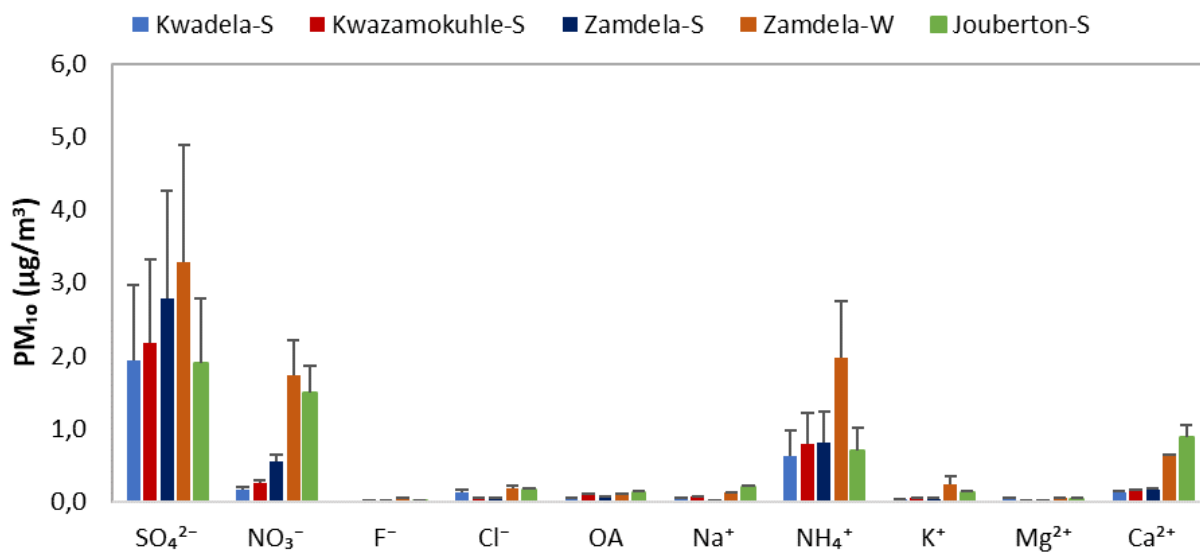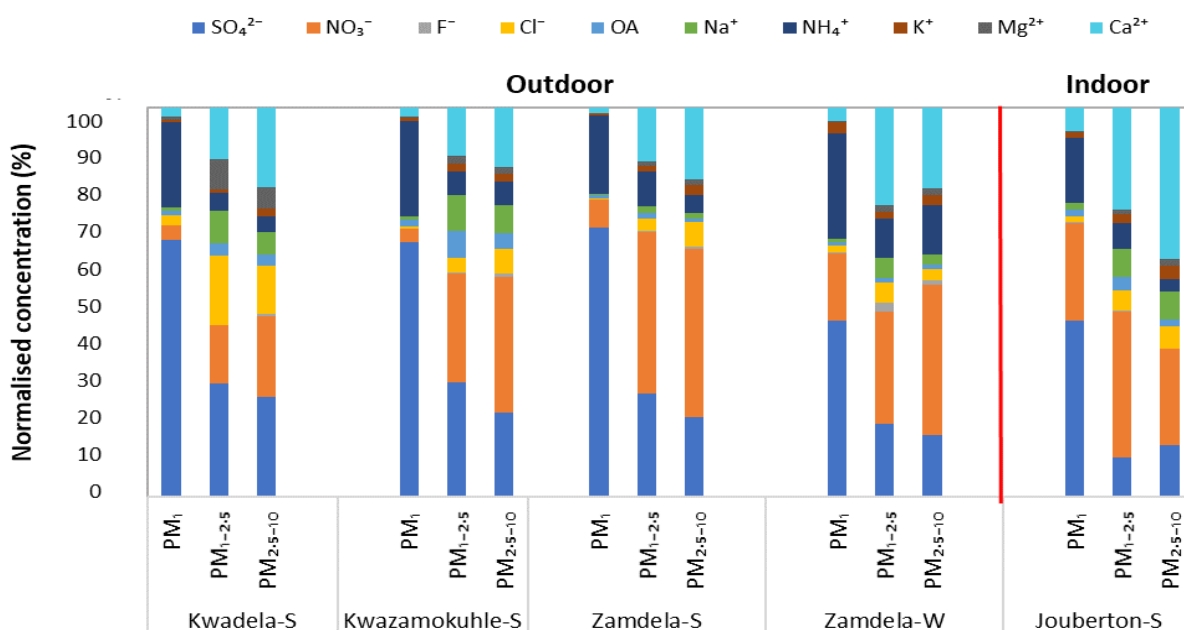

**Figure 4:** (a) Mean concentrations ( $\pm$  standard deviation) of inorganic ionic species and water-soluble OAs in PM<sub>10</sub>, and (b) normalised concentration distributions of these species in PM<sub>1</sub>, PM<sub>1-2.5</sub> and PM<sub>2.5-10</sub> at each site during respective sampling campaigns



It is evident from Figure 3 and 4(a) that the highest concentration was determined for  $\text{SO}_4^{2-}$  at each site during the respective sampling campaigns, while  $\text{NH}_4^+$  and  $\text{NO}_3^-$  were the second most abundant species. Moderately higher  $\text{Ca}^{2+}$  levels were also measured, especially, during the winter outdoor and the summer indoor campaigns with the mean  $\text{Ca}^{2+}$  concentration determined for the latter sampling campaign being higher than the average  $\text{NH}_4^+$  concentration measured during this campaign. Concentrations of other ionic species were at least an order of magnitude lower compared to  $\text{SO}_4^{2-}$ ,  $\text{NH}_4^+$  and  $\text{NO}_3^-$  levels. The highest  $\text{SO}_4^{2-}$  concentrations were determined during the summer and winter outdoor campaigns conducted at Zamdela, while similar  $\text{SO}_4^{2-}$  levels were determined for the other two summer outdoor campaigns and the summer indoor campaign.  $\text{NO}_3^-$  concentrations determined for the winter outdoor and summer indoor campaigns were significantly higher compared to levels thereof measured during the three summer outdoor campaigns, while the  $\text{NH}_4^+$  concentration recorded for the winter outdoor campaign were significantly higher compared to  $\text{NH}_4^+$  levels determined for other sampling campaigns.  $\text{NH}_4^+$  concentrations were higher than  $\text{NO}_3^-$  levels for the three summer outdoor campaigns, while  $\text{NO}_3^-$  concentrations exceeded  $\text{NH}_4^+$  levels during the winter outdoor and summer indoor campaign.  $\text{SO}_4^{2-}$  concentrations for the four summer (outdoor and indoor) were nearly 4 times higher compared to  $\text{NH}_4^+$  levels, while being approximately two times higher than  $\text{NH}_4^+$  concentrations determined for the winter outdoor campaign.  $\text{NO}_3^-$  concentrations were approximately three times lower than  $\text{SO}_4^{2-}$  levels measured during the winter outdoor and summer indoor campaigns, and almost an order of magnitude lower compared to  $\text{SO}_4^{2-}$  concentrations determined for the three summer outdoor campaigns.

$\text{SO}_4^{2-}$  and  $\text{NH}_4^+$  levels in the  $\text{PM}_1$  size fraction were an order of magnitude higher compared to their respective concentrations in the two larger size fractions for aerosol samples collected during all sampling campaigns, while OA concentrations in  $\text{PM}_1$  were approximately 5 times higher than levels thereof in  $\text{PM}_{1-2.5}$  and  $\text{PM}_{2.5-10}$ .  $\text{NO}_3^-$  concentrations in samples collected during the winter outdoor and summer indoor campaign were also an order of magnitude higher in the  $\text{PM}_1$  size fraction, while also being marginally higher in the submicron fraction for particulates collected during the three summer outdoor campaigns. Elevated levels were also observed for  $\text{Cl}^-$  and  $\text{K}^+$  in  $\text{PM}_1$  collected during the winter outdoor campaign, while  $\text{Cl}^-$  also exhibited higher concentrations in  $\text{PM}_1$  sampled during the summer outdoor campaign at Kwadela.  $\text{Cl}^-$  concentrations were higher in the  $\text{PM}_{2.5-10}$  size fraction for the other outdoor and indoor sampling campaigns.  $\text{K}^+$  levels in  $\text{PM}_1$  was marginally higher than levels thereof

in the other two size fractions for all sampling campaigns. The corresponding increased concentrations of  $\text{Cl}^-$  and  $\text{K}^+$  in the  $\text{PM}_1$  size fraction for the winter outdoor campaign can be indicative of the influence of open biomass burning in this region.  $\text{Ca}^{2+}$  and  $\text{Na}^+$  concentrations were relatively evenly distributed in all three size ranges, with the exception of moderately higher  $\text{Ca}^{2+}$  and  $\text{Na}^+$  levels determined in the  $\text{PM}_{2.5-10}$  size fraction during the summer indoor campaign. As mentioned previously, very low concentrations were determined for  $\text{Mg}^{2+}$  and  $\text{F}^-$  concentrations, which were for most sampling campaigns similar in all three size fractions.

It is evident from the normalised concentration distributions presented in Figure 4(b) for all sampling campaigns that  $\text{PM}_1$  is dominated by  $\text{SO}_4^{2-}$  and  $\text{NH}_4^+$ , with a slightly higher  $\text{NO}_3^-$  contribution in  $\text{PM}_1$  collected during the summer indoor campaign is observed. Comparison between the summer and winter outdoor campaigns also indicates a similar trend. In addition, a higher contribution from  $\text{NH}_4^+$  in the  $\text{PM}_1$  size fraction is evident for the winter outdoor campaign compared to the three summer outdoor campaigns.  $\text{SO}_4^{2-}$ ,  $\text{NO}_3^-$  and  $\text{Ca}^{2+}$  had the highest contributions in the two larger size fractions for all sampling campaigns, with the exception of higher  $\text{NH}_4^+$  contributions in the larger size fractions of winter outdoor samples and higher contributions from  $\text{Cl}^-$  in the larger size fractions in summer outdoor samples collected at Kwadela. In general, it can be concluded that  $\text{PM}_1$  was dominated by  $\text{SO}_4^{2-}$ , while  $\text{NO}_3^-$  was the major species in the large size fractions. However,  $\text{Ca}^{2+}$  had the highest contribution to chemical content in summer indoor  $\text{PM}_{2.5-10}$ . Recent ambient aerosol measurements conducted at a regional site located in the South African interior (Welgegund) also indicated  $\text{PM}_1$  being dominated by  $\text{SO}_4^{2-}$  and the larger size fractions by  $\text{NO}_3^-$  (Venter et al., 2018). In addition,  $\text{PM}_1$  measurements conducted with an ACSM also indicated the highest contributions from  $\text{SO}_4^{2-}$  and  $\text{NH}_4^+$  to the chemical content of submicron particulates (Tiitta et al., 2014). Higher relative contribution of species in the larger size fractions can be attributed to significantly lower  $\text{SO}_4^{2-}$  and  $\text{NH}_4^+$  levels in these size fractions (Figure 3).

In Table 3 the mean concentrations of ionic species determined in this study is listed in relation to mean/median concentrations determined for inorganic ions in other studies in South Africa conducted at a rural, regional and industrial site (water-soluble organic acids were not determined in these other studies), which indicate similar levels and concentration distributions for inorganic ions as determined in this study conducted in low-income urban settlements. In all these studies  $\text{SO}_4^{2-}$  had the highest concentration, while  $\text{NH}_4^+$  and  $\text{NO}_3^-$  were the second and/or third most abundant species. Venter et al., (2018) also indicated

significantly higher  $\text{SO}_4^{2-}$  concentrations in the  $\text{PM}_{10}$  size fraction compared to its respective levels in larger size fractions, as well as concentrations of other species in all size fractions at a regional (Welgegund) and an industrial site (Marikana). Very low  $\text{NO}_3^-$  concentrations were determined at the rural background site, Botsalano, with  $\text{K}^+$  at this rural site having concentrations in the same range as  $\text{NH}_4^+$ . As indicated by these previous studies conducted in this region of South Africa,  $\text{SO}_4^{2-}$  occurs predominantly in the ultrafine size fraction and is generally considered a secondary pollutant formed from the oxidation of atmospheric  $\text{SO}_2$  associated with industrial emissions (Collette et al., 2010; Lourens et al., 2011). Particulate  $\text{NH}_4^+$  is almost exclusively a secondary pollutant formed from emissions of gaseous  $\text{NH}_3$  (Seinfeld and Pandis, 2006). Atmospheric particulate  $\text{NO}_3^-$  is related to oxidation of gaseous  $\text{NO}_2$  associated with fossil fuel combustion, vehicular emissions and domestic fuel burning (Collett et al., 2010; Lourens et al., 2016; Venter et al., 2012). Very low  $\text{NO}_3^-$  concentrations in the ultrafine size fraction can be attributed to high  $\text{SO}_4^{2-}$  levels substituting  $\text{NO}_3^-$  in  $\text{NH}_4\text{NO}_3$ . Venter et al., (2018) and Tiitala et al., (2014) attributed higher contributions from Ca, Na and Cl in the larger size fractions to larger particulates associated with marine (NaCl) and terrigenous (e.g. wind-blown dust) sources. It is interesting to note that, with the exception of higher contribution of  $\text{Ca}^{2+}$  to ionic composition in summer indoor  $\text{PM}_{2.5-10}$ , inorganic ions in indoor aerosols had similar concentration distributions than that of ambient aerosols collected in this study and in other studies in this part of South Africa, which signifies the regional impacts on indoor atmosphere of emissions associated with the highly industrialised and densely populated north-eastern interior of South Africa.

Also listed in Table 3, are the mean levels determined for inorganic ions and water-soluble organic acids in other parts of Africa and the rest of the world. Aerosol measurements conducted at a site in proximity of wood burning in Abidjan, Côte d'Ivoire, indicated that  $\text{Cl}^-$ ,  $\text{NH}_4^+$  and  $\text{K}^+$  had the highest concentrations in the  $\text{PM}_{10}$  size fraction with  $\text{NH}_4^+$  levels being at least three times higher and  $\text{Cl}^-$  concentration an order of magnitude higher compared to levels thereof determined in  $\text{PM}_{10}$  in this study.  $\text{SO}_4^{2-}$  levels at this West African site impacted by household wood combustion were similar than  $\text{SO}_4^{2-}$  concentrations determined in this study conducted in low-income urban settlements, while the relative contribution of  $\text{NO}_3^-$  compared to  $\text{SO}_4^{2-}$  in  $\text{PM}_{10}$  was larger at this site in Abidjan.  $\text{SO}_4^{2-}$  and  $\text{NO}_3^-$  in  $\text{PM}_{10}$  were similar than levels determined for these species in  $\text{PM}_{10}$  during the summer indoor campaign in this study. Concentrations of other ionic species (including OAs) in the  $\text{PM}_{10}$  size fraction of aerosols collected at this site in Abidjan in proximity of wood burning were an order of

magnitude higher than their respective concentrations determined for most of the sampling campaigns conducted in this study. Also,  $\text{Ca}^{2+}$  levels determined in  $\text{PM}_1$  during the winter outdoor and summer indoor campaigns in  $\text{PM}_1$  were 5 and 2.5 times lower, respectively than  $\text{Ca}^{2+}$  concentrations determined at the domestic burning site in Abidjan.  $\text{SO}_4^{2-}$  and  $\text{NO}_3^-$  had the highest concentrations in  $\text{PM}_1$  at a waste burning site at Abidjan, while higher contributions are also observed for  $\text{NH}_4^+$ ,  $\text{Cl}^-$  and  $\text{K}^+$ . Comparison with two sites in West Africa in proximity of vehicular traffic (Abidjan and Cotonou, Benin), indicated that  $\text{NO}_3^-$  dominated the  $\text{PM}_1$  size fraction, while  $\text{SO}_4^{2-}$  and  $\text{NH}_4^+$  concentrations were similar than levels determined for these species in this study. Larger contributions are also observed for  $\text{Cl}^-$  and  $\text{K}^+$  at these sites in West Africa impacted by traffic. Concentrations of all ionic species in the  $\text{PM}_{2.5-10}$  size fraction at all these sites in Abidjan and Cotonou were an order of magnitude higher than levels determined for these species in low-income settlements in South Africa.  $\text{NO}_3^-$  and  $\text{Ca}^{2+}$  concentrations determined in  $\text{PM}_{2.5-10}$  in this study were closer to levels thereof determined at Abidjan and Cotonou, but still lower. In addition, the concentrations of all ionic species in the  $\text{PM}_1$  size fraction were higher than their corresponding levels in the  $\text{PM}_{2.5-10}$  size fraction at all sites in West Africa. The influence of marine air masses on atmospheric composition is evident at these two coastal West African cities.

The mean concentrations determined for inorganic ions in  $\text{PM}_{2.5}$  collected at two European (Paris and Budapest), two Chinese (Beijing and Weinan) and two Indian (Pune and Bhopal) cities, as well as one Latin American city (Mexico), are listed in Table 3.  $\text{SO}_4^{2-}$  and  $\text{NO}_3^-$  had the highest concentrations in  $\text{PM}_{2.5}$  at the two European cities, with  $\text{NH}_4^+$  being the second most abundant.  $\text{SO}_4^{2-}$  and  $\text{NH}_4^+$  levels at the two European urban sites were similar than concentrations determined for these species at low-income urban settlements, while higher  $\text{NO}_3^-$  levels are reported for the European sites with  $\text{NO}_3^-$  concentrations at Budapest exceeding  $\text{SO}_4^{2-}$  levels. Concentrations of other ionic species were also higher at the two European urban sites compared to levels thereof determined in this study, with the exception of  $\text{Ca}^{2+}$  levels. Similarly to the two European cities,  $\text{SO}_4^{2-}$  and  $\text{NO}_3^-$  were also the most abundant species at the two urban sites in China, while  $\text{NH}_4^+$  were the second most abundant species. However, the concentrations of  $\text{SO}_4^{2-}$ ,  $\text{NO}_3^-$  and  $\text{NH}_4^+$  were approximately 10 times higher than levels determined for these species at the European urban sites and at low-income settlements in this study. Concentration of other inorganic ions were at least an order of magnitude higher at these two Chinese cities. The highest ionic concentrations were also

489 reported for  $\text{SO}_4^{2-}$  and  $\text{NO}_3^-$  at Bhopal in India with  $\text{NH}_4^+$  having the second highest  
490 concentration.  $\text{SO}_4^{2-}$  levels at Bhopal were slightly higher than levels thereof in low-income  
491 settlements in the South African interior, while  $\text{NO}_3^-$  and  $\text{NH}_4^+$  concentrations were  
492 substantially higher at Bhopal.  $\text{SO}_4^{2-}$  had the highest concentration at Pune in India, which  
493 were four times higher than  $\text{SO}_4^{2-}$  levels determined in this study.  $\text{NO}_3^-$  and  $\text{NH}_4^+$   
494 concentrations at Pune were similar than levels thereof in low-income settlement in South  
495 Africa. However,  $\text{NO}_3^-$  and  $\text{NH}_4^+$  levels at Pune were significant lower compared to  $\text{Cl}^-$  and  
496  $\text{Na}^+$  concentrations that were the second and third most abundant species, respectively at  
497 Pune –  $\text{Cl}^-$  levels at Pune were two orders of magnitude higher than levels thereof determined  
498 in this study. Concentrations of other inorganic ions were also higher at the Indian urban sites  
499 compared to levels of these species at low-income settlements in South Africa. Similarly to  
500 the concentration distribution observed at South Africa sites,  $\text{SO}_4^{2-}$  was the most abundant  
501 species with  $\text{NO}_3^-$  and  $\text{NH}_4^+$  being the second most abundant at the urban site in Mexico.  
502 Moderately higher concentrations were reported for  $\text{SO}_4^{2-}$ ,  $\text{NO}_3^-$  and  $\text{NH}_4^+$  at Mexico  
503 compared to levels thereof determined in this study, while the concentrations of other  
504 inorganic ions were at least an order of magnitude higher at the site in Mexico.

**Table 3.** Mean/median concentrations ( $\mu\text{g m}^{-3}$ ) of inorganic ionic species and water-soluble organic acids determined at low-income settlements in this study, as well as in other studies in South Africa and the rest of the world

| Source                    | Date                        | Place                         | SO <sub>4</sub> <sup>2-</sup>                 | NO <sub>3</sub> <sup>-</sup>      | Cl <sup>-</sup>                          | F <sup>-</sup> | OA     | Na <sup>+</sup> | NH <sub>4</sub> <sup>+</sup> | K <sup>+</sup> | Mg <sup>2+</sup> | Ca <sup>2+</sup> |       |       |      |
|---------------------------|-----------------------------|-------------------------------|-----------------------------------------------|-----------------------------------|------------------------------------------|----------------|--------|-----------------|------------------------------|----------------|------------------|------------------|-------|-------|------|
| This study                | 03/2015-03/2017             | Kwadelia <sup>a</sup>         | Mean PM <sub>1</sub>                          | 1.84                              | 0.097                                    | 0.08           | 0.0001 | 0.033           | 0.02                         | 0.61           | 0.02             | 0.026            | 0.06  |       |      |
|                           |                             |                               | Mean PM <sub>1-2.5</sub>                      | 0.04                              | 0.021                                    | 0.03           | 0.0001 | 0.004           | 0.01                         | 0.01           | 0.001            | 0.011            | 0.02  |       |      |
|                           |                             |                               | Mean PM <sub>2.5-10</sub>                     | 0.06                              | 0.044                                    | 0.03           | 0.0012 | 0.006           | 0.01                         | 0.01           | 0.004            | 0.015            | 0.04  |       |      |
|                           |                             | Kwazankulu <sup>a</sup>       | Mean PM <sub>1</sub>                          | 2.06                              | 0.11                                     | 0.02           | 0.0006 | 0.056           | 0.03                         | 0.77           | 0.03             | 0.008            | 0.07  |       |      |
|                           |                             |                               | Mean PM <sub>1-2.5</sub>                      | 0.05                              | 0.05                                     | 0.01           | 0.0003 | 0.012           | 0.02                         | 0.01           | 0.003            | 0.003            | 0.02  |       |      |
|                           |                             |                               | Mean PM <sub>2.5-10</sub>                     | 0.06                              | 0.10                                     | 0.02           | 0.0021 | 0.012           | 0.02                         | 0.02           | 0.01             | 0.005            | 0.04  |       |      |
|                           |                             | Zandela <sup>a</sup>          | Mean PM <sub>1</sub>                          | 2.80                              | 0.70                                     | 0.06           | 0.006  | 0.049           | 0.03                         | 1.27           | 0.11             | 0.012            | 0.14  |       |      |
|                           |                             |                               | Mean PM <sub>1-2.5</sub>                      | 0.11                              | 0.17                                     | 0.03           | 0.010  | 0.007           | 0.02                         | 0.05           | 0.01             | 0.012            | 0.12  |       |      |
|                           |                             |                               | Mean PM <sub>2.5-10</sub>                     | 0.12                              | 0.27                                     | 0.03           | 0.008  | 0.007           | 0.02                         | 0.07           | 0.02             | 0.011            | 0.14  |       |      |
|                           |                             | Jouberton <sup>b</sup>        | Mean PM <sub>1-2.5</sub>                      | 1.64                              | 0.92                                     | 0.05           | 0.003  | 0.07            | 0.06                         | 0.60           | 0.06             | 0.017            | 0.22  |       |      |
| Mean PM <sub>1-2.5</sub>  | 0.07                        | 0.27                          | 0.04                                          | 0.001                             | 0.03                                     | 0.05           | 0.19   | 0.05            | 0.02                         | 0.010          | 0.19             |                  |       |       |      |
| Mean PM <sub>2.5-10</sub> | 0.16                        | 0.30                          | 0.07                                          | 0.001                             | 0.02                                     | 0.09           | 0.04   | 0.04            | 0.04                         | 0.020          | 0.47             |                  |       |       |      |
| Aurelia et al., (2016)    | 9-5/10/2007 & 01-02/2008    | South Africa                  | Mean PM <sub>1</sub>                          | 3.92                              | 0.03                                     | -              | -      | 0.05            | 1.02                         | 0.18           | -                | -                | -     |       |      |
|                           |                             |                               | Botsaano, rural <sup>a</sup>                  | Mean PM <sub>1</sub>              | 2.4                                      | 0.5            | 0.03   | -               | -                            | 0.9            | -                | -                | -     | -     |      |
|                           |                             |                               | Welgegend, regional <sup>a</sup>              | Median PM <sub>1-2.5</sub>        | 1.83                                     | 0.27           | 0.07   | -               | 0.09                         | 0.55           | 0.09             | 0.02             | 0.08  | 0.17  |      |
|                           |                             | Trita et al., (2014)          | Marikana <sup>a</sup> , industrial            | Median PM <sub>2.5-10</sub>       | 0.37                                     | 0.40           | 0.06   | -               | 0.07                         | 0.09           | 0.03             | 0.04             | 0.17  | -     |      |
|                           |                             |                               | Venter et al., (2018)                         | Welgegend <sup>a</sup> , regional | 1.35                                     | 0.02           | 0.005  | 0.015           | 0.16                         | 0.44           | 0.032            | 0.003            | 0.019 | 0.019 |      |
|                           |                             |                               |                                               | Median PM <sub>1-2.5</sub>        | 0.1                                      | 0.04           | 0.0055 | >0.005          | 0.21                         | 0.04           | 0.004            | 0.005            | 0.014 | 0.005 |      |
|                           |                             | Median PM <sub>2.5-10</sub>   | 0.05                                          | 0.057                             | 0.007                                    | >0.005         | 0.019  | 0.005           | 0.005                        | 0.006          | 0.025            | 0.025            |       |       |      |
|                           |                             | Adon et al., (2020)           | 07/2015-01/2017                               | Africa                            | Abujan, Côte Ivoire <sup>a</sup> , urban | 1.23           | 0.86   | 5.73            | -                            | 0.39           | 0.34             | 2.79             | 1.99  | 0.18  | 0.55 |
|                           |                             |                               |                                               |                                   | Domestic fire site <sup>a</sup>          | 0.64           | 1.36   | 1.31            | -                            | 0.27           | 0.76             | 0.11             | 0.39  | 0.44  | 0.98 |
|                           |                             |                               |                                               |                                   | Mean PM <sub>1-0.10/2</sub>              | 0.29           | 0.54   | 0.59            | -                            | 0.25           | 0.38             | 0.07             | 0.22  | 0.23  | 0.87 |
| Mean PM <sub>2-5.1</sub>  | 1.88                        |                               |                                               |                                   | 0.89                                     | 0.37           | -      | 0.06            | 0.96                         | 0.06           | 0.64             | 0.03             | 0.37  |       |      |
| Mean PM <sub>0-2</sub>    | 0.50                        |                               |                                               |                                   | 1.74                                     | 0.94           | -      | 0.14            | 0.71                         | 0.06           | 0.11             | 0.11             | 0.74  |       |      |
| Traffic site <sup>a</sup> | Mean PM <sub>1-0.10/2</sub> |                               |                                               | 0.27                              | 0.75                                     | 0.66           | -      | 0.10            | 0.48                         | 0.06           | 0.06             | 0.06             | 0.39  |       |      |
|                           | Mean PM <sub>2-5.1</sub>    |                               |                                               | 1.23                              | 1.34                                     | 0.25           | -      | 0.21            | 0.60                         | 0.55           | 0.03             | 0.03             | 0.48  |       |      |
|                           | Mean PM <sub>0-2</sub>      |                               |                                               | 0.41                              | 1.52                                     | 0.85           | -      | 0.12            | 0.65                         | 0.14           | 0.09             | 0.08             | 0.79  |       |      |
|                           | Mean PM <sub>1-0.10/2</sub> |                               |                                               | 0.21                              | 0.60                                     | 0.64           | -      | 0.10            | 0.45                         | 0.06           | 0.05             | 0.05             | 0.49  |       |      |
|                           | Mean PM <sub>2-5.1</sub>    |                               |                                               | 2.14                              | 1.50                                     | 0.47           | -      | 0.25            | 0.34                         | 0.34           | 0.68             | 0.07             | 1.89  |       |      |
| Mean PM <sub>0-2</sub>    | 1.04                        | 2.77                          | 1.61                                          | -                                 | 0.19                                     | 1.14           | 0.17   | 0.18            | 1.90                         | 0.17           |                  |                  |       |       |      |
| Mean PM <sub>2-5.1</sub>  | 0.39                        | 0.91                          | 0.94                                          | -                                 | 0.10                                     | 0.65           | 0.08   | 0.06            | 0.07                         | 1.13           |                  |                  |       |       |      |
| Bressi et al., (2013)     | 09/2009-09/2010             | Other international locations | Paris, France <sup>a</sup>                    | 1.9                               | 2.7                                      | 0.18           | -      | 0.16            | 1.4                          | 0.12           | 0.03             | 0.08             | 0.13  |       |      |
|                           |                             |                               | Szenna Square, Budapest, Hungary <sup>a</sup> | 2.84                              | 2.14                                     | 0.11           | -      | 0.22            | 1.33                         | 0.18           | 0.05             | 0.16             | 0.16  |       |      |
|                           |                             |                               | Weinan, China <sup>a</sup>                    | 24.7                              | 18                                       | 3              | 0.1    | 1.3             | 10                           | 1.3            | 0.2              | 0.23             | 0.69  |       |      |
|                           |                             |                               | Beijing, China <sup>a</sup>                   | 20.93                             | 29.09                                    | 4.07           | -      | 0.58            | 15.44                        | 1.4            | 0.47             | 0.28             | 0.51  |       |      |
|                           |                             |                               | Pune, India <sup>a</sup>                      | 4.8                               | 0.98                                     | 3.42           | -      | 1.98            | 0.51                         | 0.47           | 0.28             | 0.51             | 0.51  |       |      |
|                           |                             |                               | VVNP Bhupal, Central India <sup>a</sup>       | 3.35                              | 3.02                                     | 1.46           | 0.35   | 0.96            | 2.07                         | 0.98           | 0.18             | 0.77             | 0.77  |       |      |
|                           |                             |                               | Tecunne University, Mexico <sup>a</sup>       | 3.42                              | 1.81                                     | 0.73           | -      | -               | 1.09                         | 0.97           | 0.23             | 1.08             | 1.08  |       |      |
|                           |                             |                               | Mean PM <sub>1-2.5</sub>                      | 1.9                               | 2.7                                      | 0.18           | -      | 0.16            | 1.4                          | 0.12           | 0.03             | 0.08             | 0.13  |       |      |
|                           |                             |                               | Mean PM <sub>2.5-10</sub>                     | 24.7                              | 18                                       | 3              | 0.1    | 1.3             | 10                           | 1.3            | 0.2              | 0.23             | 0.69  |       |      |
|                           |                             |                               | Mean PM <sub>1-2.5</sub>                      | 20.93                             | 29.09                                    | 4.07           | -      | 0.58            | 15.44                        | 1.4            | 0.47             | 0.28             | 0.51  |       |      |
| Mean PM <sub>2.5-10</sub> | 4.8                         | 0.98                          | 3.42                                          | -                                 | 1.98                                     | 0.51           | 0.47   | 0.28            | 0.51                         | 0.51           |                  |                  |       |       |      |
| Mean PM <sub>1-2.5</sub>  | 3.35                        | 3.02                          | 1.46                                          | 0.35                              | 0.96                                     | 2.07           | 0.98   | 0.18            | 0.77                         | 0.77           |                  |                  |       |       |      |
| Mean PM <sub>2.5-10</sub> | 3.42                        | 1.81                          | 0.73                                          | -                                 | -                                        | 1.09           | 0.97   | 0.23            | 1.08                         | 1.08           |                  |                  |       |       |      |

a= Outdoor; b= Indoor

## Acidity

Similarly to Tiitta et al., (2014) and Venter et al., (2018) who reported acidity for ambient PM<sub>1</sub> sampled at Welgegund in South Africa, the acidity of the outdoor and indoor PM<sub>1</sub> collected in low-income urban settlements were estimated by relating the measured NH<sub>4</sub><sup>+</sup> concentrations ([NH<sub>4</sub><sup>+</sup>]<sub>meas</sub>) to the NH<sub>4</sub><sup>+</sup> levels required to completely neutralise SO<sub>4</sub><sup>2-</sup>, NO<sub>3</sub><sup>-</sup> and Cl<sup>-</sup>, which was calculated as follows:

$$[NH_4^+]_{cal} \mu g.m^{-3} = 18 g.mol^{-1} \times \left\{ \left( 2 \times \frac{[SO_4^{2-}] \mu g.m^{-3}}{96 g.mol^{-1}} \right) + \frac{[NO_3^-] \mu g.m^{-3}}{62 g.mol^{-1}} + \frac{[Cl^-] \mu g.m^{-3}}{35.5 g.mol^{-1}} \right\} \quad (1)$$

If [NH<sub>4</sub><sup>+</sup>]<sub>cal</sub> ≈ [NH<sub>4</sub><sup>+</sup>]<sub>meas</sub> particulates can be considered neutralised whereas if [NH<sub>4</sub><sup>+</sup>]<sub>cal</sub> > [NH<sub>4</sub><sup>+</sup>]<sub>meas</sub> aerosols could be classified as acidic. This is a relatively simple approach that assumes negligible influences from organic acids, metal species and other bases on NH<sub>4</sub><sup>+</sup> levels. Similarly to Venter et al., (2018), only the PM<sub>1</sub> size fraction that contained the bulk of the ionic concentration (i.e. SO<sub>4</sub><sup>2-</sup> and NH<sub>4</sub><sup>+</sup>) were considered. In Figure 5 [NH<sub>4</sub><sup>+</sup>]<sub>meas</sub> are plotted in relation to [NH<sub>4</sub><sup>+</sup>]<sub>cal</sub> for PM<sub>1</sub> collected during outdoor summer, outdoor winter and indoor sampling campaigns (the three summer campaigns at Kwadela, Kwazamokuhle and Zamdela were combined, and as indicated above, due to instrument failure ionic species were only measured for indoor particulates collected during the summer campaign). The 1:1 line in this figure corresponds to a bulk neutralised state. It is evident from Figure 5 that all outdoor and indoor PM<sub>1</sub> collected were acidic, with summer outdoor PM<sub>1</sub> being closer to a neutralised state compared to outdoor winter and indoor summer PM<sub>1</sub>. The acidity of outdoor PM<sub>1</sub> collected in low-income urban settlements correspond to previous observations reported by Tiitta et al., (2014) and Venter et al., (2014). However, Venter et al., (2018) indicated that ambient PM<sub>1</sub> collected during the dry months, which correspond to winter as previously mentioned, were closer to the neutralised state compared PM<sub>1</sub> measured during the wet season, i.e. summer. This difference can be attributed to Welgegund being a regional site with no local point sources, which are impacted by aged air masses passing over source regions in the north-eastern interior. Venter et al., (2018) argued cloud formation processes could contribute to formation of secondary SO<sub>4</sub><sup>2-</sup>, resulting in increased acidity of PM<sub>1</sub> during the wet summer. Ambient measurements in this study were conducted in low-income urban settlements situated within proximity of large point sources in the north-eastern interior. As

previously mentioned, this region is characterised by increased levels of pollutants during winter, which include higher concentrations of ambient  $\text{SO}_2$  and  $\text{NO}_2$  contributing to elevated  $\text{SO}_4^{2-}$  and  $\text{NO}_3^-$  levels, especially, considering  $\text{SO}_4^{2-}$  being the main acidic ion. (Collette et al., 2010; Lourens et al., 2011). Acidity of the summer indoor  $\text{PM}_{10}$  at Jouberton were similar than the acidity of the winter outdoor  $\text{PM}_{10}$  at Zamdela.

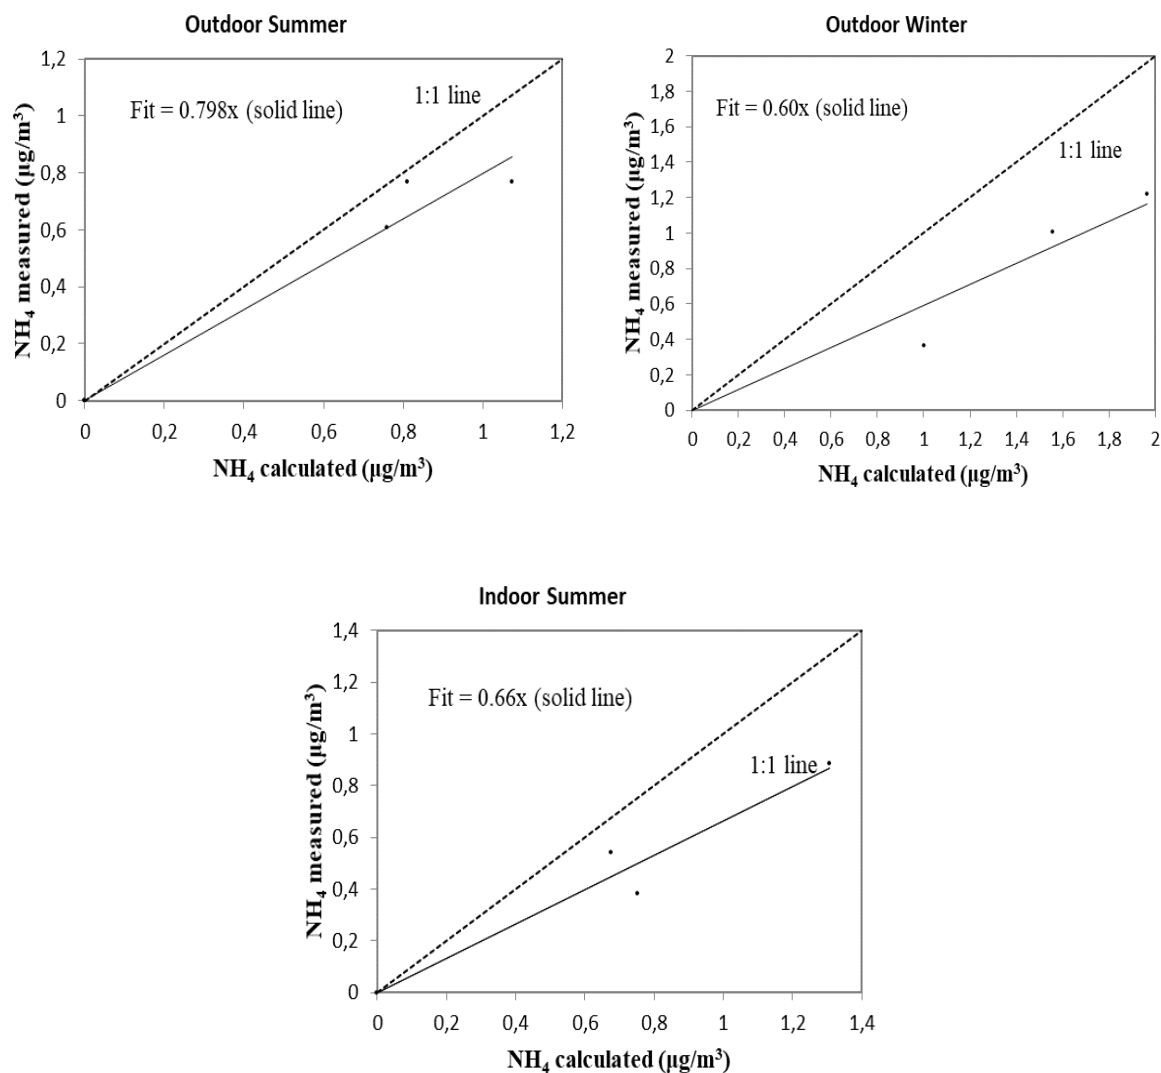

**Figure 5:**  $[\text{NH}_4^+]_{\text{meas}}$  in relation to  $[\text{NH}_4^+]_{\text{cal}}$  for  $\text{PM}_{10}$  collected during outdoor summer, outdoor winter and indoor sampling campaigns



### 3.3 Trace elements

There are limitations associated with using nitric digestion to extract and dissolve metal species for ICP-MS analysis, which mainly relates to the inability of the method to extract Si and silicate minerals. Therefore, Si was not quantified in this study, while lower concentrations of metal species associated with silicates e.g. Fe, Ca, Al, Mg and K might be reported. Crustal elements determined with ICP-MS could therefore be underrepresented. Notwithstanding the limitation of this analytical method, this technique is generally used to determine trace elements concentrations in atmospheric aerosols (e.g. Venter et al., 2017).

The mean total trace elements concentrations determined in  $PM_{10}$ ,  $PM_{10-2.5}$  and  $PM_{2.5-10}$  at each site during the respective sampling campaigns are presented with a breakdown of individual trace element concentrations in Figure 6(a), while the normalised trace element compositions are shown in Figure 6(b). The combined concentrations of trace elements that were below the detection limit in 75% or more collected samples (Section 2.3.2 and Figure A1) are presented as “other” in Figure 6.

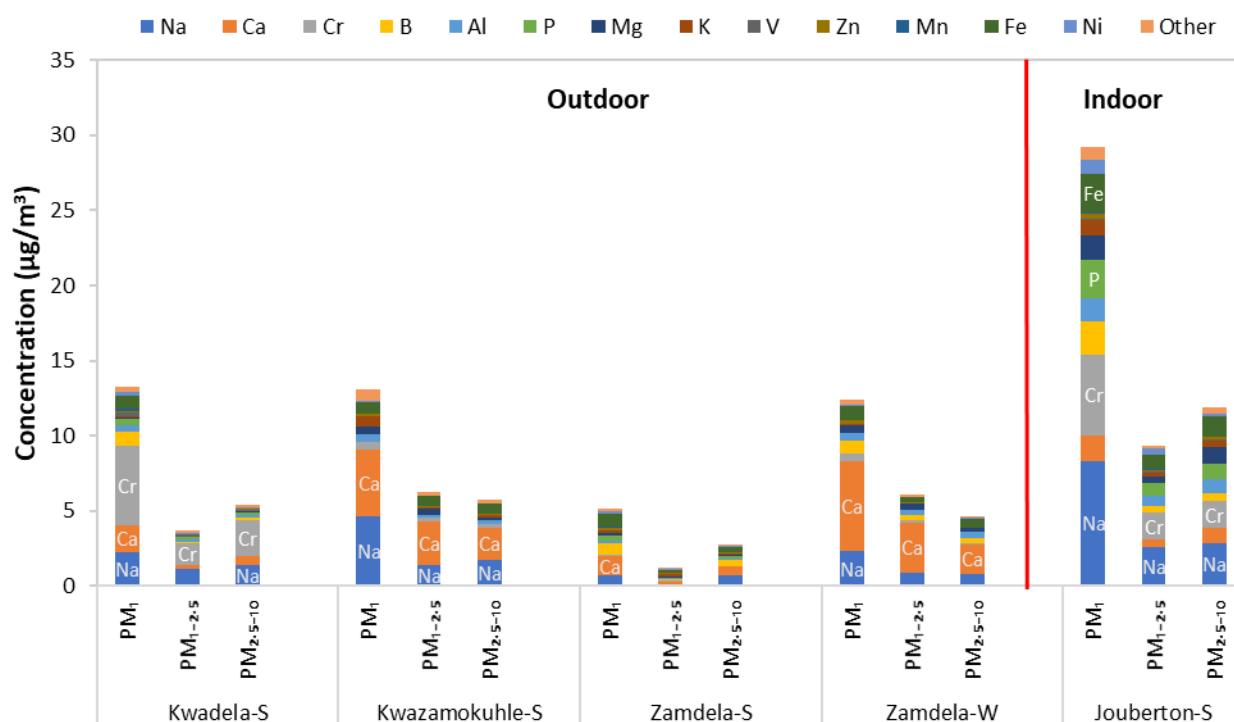

(a)

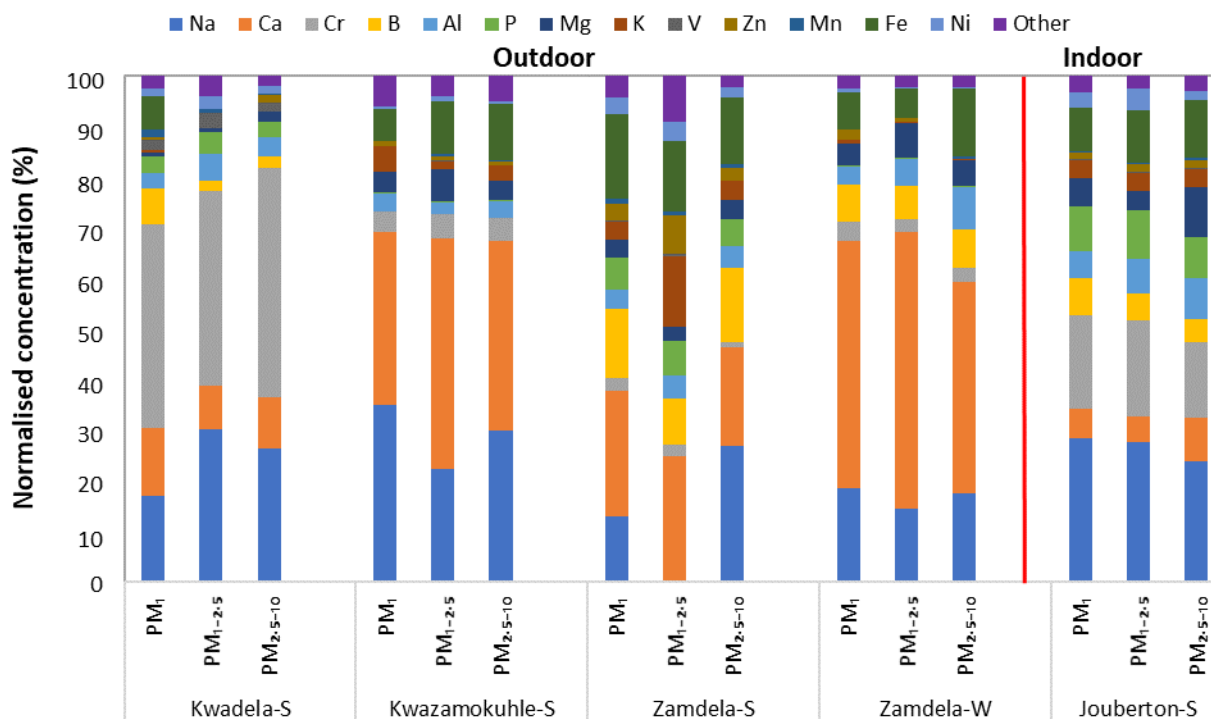

(b)

**Figure 6:** (a) Mean trace element concentrations, and (b) normalised concentration distributions of individual trace elements species, determined in PM<sub>1</sub>, PM<sub>1-2.5</sub> and PM<sub>2.5-10</sub> at each site during respective sampling campaigns

The highest total trace element concentrations were determined for aerosols collected during the summer indoor campaign in each size fraction (Figure 6(a)). The highest total trace element levels occurred in the PM<sub>1</sub> size fraction of indoor particulates, which were significantly higher than total trace element levels determined in the two other size fractions of indoor aerosols, as well as total trace element concentrations measured in all three size fractions of aerosols collected during the outdoor campaigns. Comparison between the total trace element concentrations determined during the summer and winter outdoor campaigns at Zamdela, indicate higher total trace element levels in all three size fractions during winter. However, the total trace element concentrations determined in the three aerosol size fractions collected during the two summer outdoor campaigns at Kwadela and Kwazamokuhle were similar than level thereof determined for the winter outdoor campaign. The highest total trace element concentrations also occurred in the PM<sub>1</sub> size fraction of aerosols collected during the four outdoor campaigns. Assessments of atmospheric trace elements conducted at

Welgegund and Marikana in South Africa indicated higher total trace element concentrations during the dry winter season (Venter et al., 2017; Van Zyl et al., 2014). As mentioned above, Welgegund is a regional site in the South African interior, while Marikana is situated in the highly industrialised western Bushveld Igneous Complex that holds a large number of pyrometallurgical smelters. Measurements conducted at these sites over a period of one year did, however, not reveal a very strong seasonal trend for atmospheric trace elements. Furthermore, it seemed from these studies that wet removal of particulates was more significant to seasonal variability than wind-generation thereof.

It is evident from Figure 6(a) and (b) that Na and Ca had the highest concentrations in all three size fractions of aerosols collected during the outdoor campaigns conducted at Kwazamokuhle and Zamdela (with the exception of the  $PM_{1-2.5}$  size fraction of aerosols collected during the summer campaign at Zamdela for which Ca and K had the largest contribution to total trace element concentration and no Na was detected), while Na and Cr had the highest levels in  $PM_1$ ,  $PM_{1-2.5}$  and  $PM_{2.5-10}$  collected during the summer outdoor campaign at Kwadela and the summer indoor campaign at Jouberton. The higher total trace element concentrations determined during the winter outdoor campaign at Zamdela compared to the summer outdoor campaign conducted at this site is mainly attributed to significantly higher Ca levels measured during winter. Although similar Cr concentrations were determined for the sampling campaigns conducted at Kwadela and Jouberton, the Cr contribution to total trace element concentration was particularly significant at Kwadela in all three size fractions. Relatively high Fe concentrations were also determined in all three size fractions of particulates collected during all sampling campaigns in this study. Moderately higher P concentrations were also evident in aerosol samples collected during the summer indoor campaign, while relatively high contributions to total trace element concentrations were also observed for B in particulates collected at Zamdela.

The mean size distributions of individual trace element species determined at each site during the respective sampling campaigns are presented in Figure 7. It is evident that ~40% and more of each trace element species occurred in the  $PM_1$  size fraction of aerosols collected during the outdoor campaigns (with the exception of Mn and V at Kwazamokuhle), while ~50% and more of each trace element species were in the  $PM_1$  size fraction of summer indoor particulates. In addition, 70% and more of trace elements detected in aerosol samples collected in low-income settlements (except for Zn and Mg at Kwadela) occurred in the  $PM_1$  and  $PM_{1-2.5}$  size fraction. The mean size distributions of trace element species observed in

this study correspond to average size distributions of trace elements determined at the regional site Welgegund (Venter et al., 2017) where the largest percentage (>70%) of individual trace elements occurring in the PM<sub>1</sub> and PM<sub>1-2.5</sub> size fractions was attributed to the regional impacts of industrial (high-temperature) sources. Cr, Mn, V, Zn and Ni are generally related to pyrometallurgical activities. Van Zyl et al., (2014) indicated that Cr, Mn, V, Zn and Ni were almost completely in the PM<sub>2.5</sub> size fraction of aerosols collected in the highly industrialised Bushveld Igneous Complex within proximity of several pyrometallurgical smelters. Trace element species occurring in the PM<sub>2.5-10</sub> size fraction are generally associated with wind-blown dust, and typically include species such as Al, Fe, Mg and Ca. Trace element species in the PM<sub>2.5-10</sub> size fraction at Welgegund were also ascribed to the influence of wind-blown dust (Venter et al., 2017), while Van Zyl et al., (2014) also considered wind-blown dust the major source of Al, B, Fe, Na, K and Mg in PM<sub>2.5-10</sub>. Therefore, the regional impacts of industrial activities in the north-eastern interior are also reflected by the mean trace element concentrations, as well as normalised concentration- and size distributions of individual trace element species presented in this study for low-income urban settlements, while the influence of wind-blown dust is also evident.

638

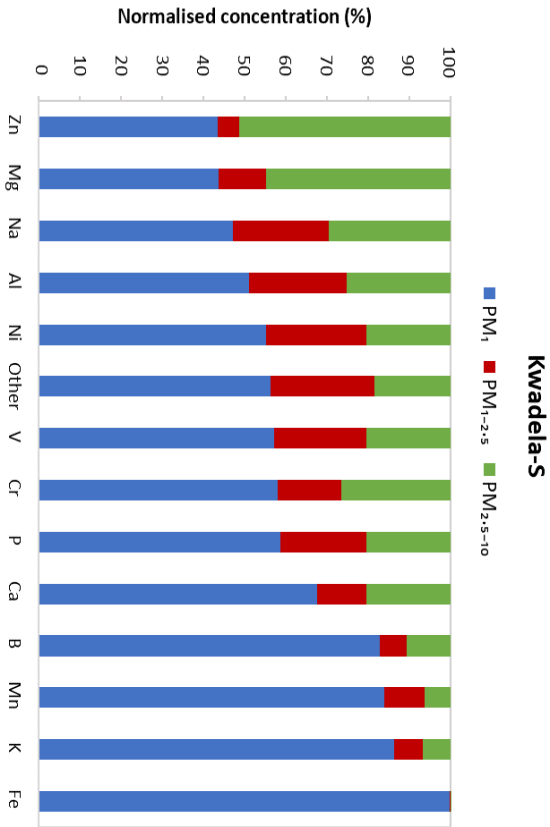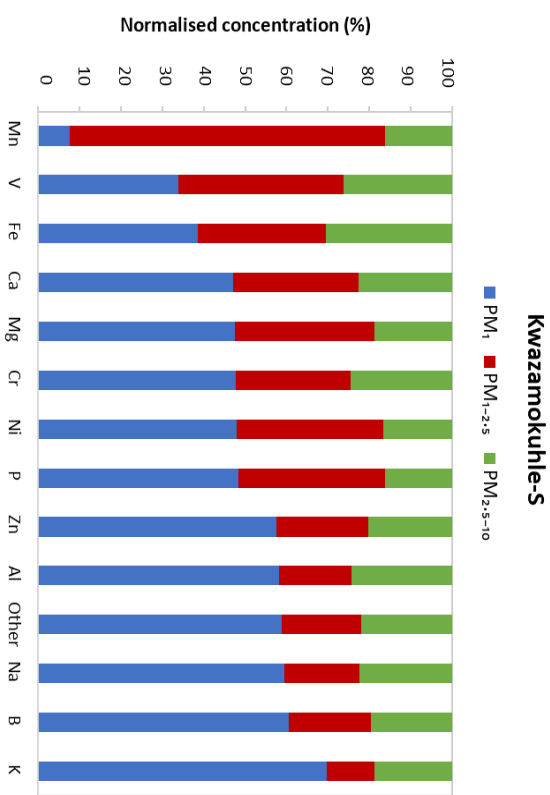

639

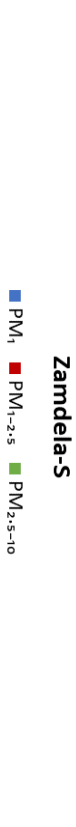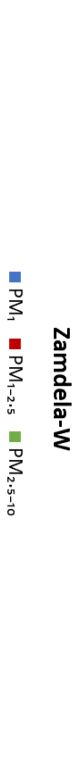

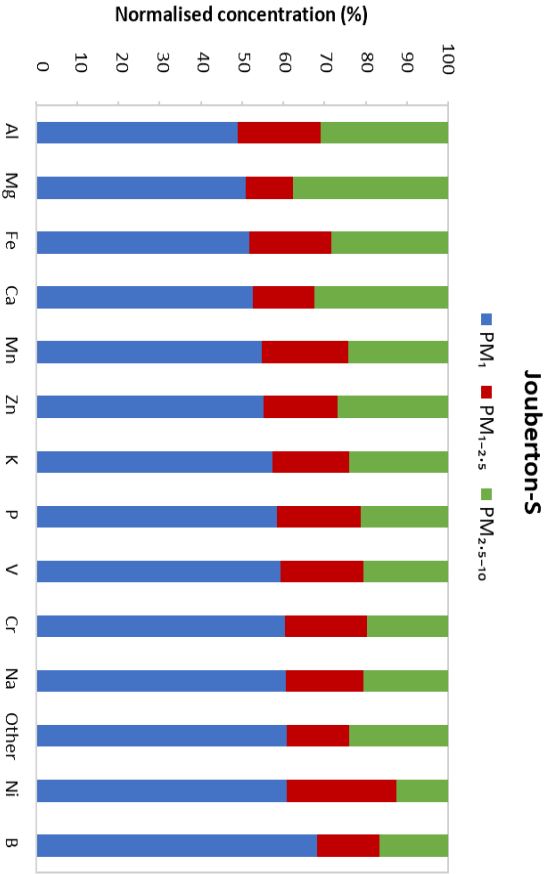

**Figure 7:** Size distributions of individual trace elements detected at each site during respective sampling campaigns. Species are arranged by increasing concentration in the PM<sub>1</sub> size fraction

In Table 4 the average trace element concentrations determined in PM<sub>10</sub> in this study (combined mean concentrations in PM<sub>1</sub>, PM<sub>1-2.5</sub> and PM<sub>2.5-10</sub>) in low-income settlement are contextualised with mean trace element concentrations measured in other studies in South Africa and urban areas in other parts of the world. As previously mentioned, Be and Tl were below the detection limit of the analytical technique for the entire sampling period in all the sites, while Sb, Ba, Cu, As, Se, Rb, Sr, Mo, Pd, Ag, Pb, Au, Hg, Ti, Co, Pt, Bi, Th and U were below the detection limit in 75% or more collected samples. Therefore, concentrations of these species listed in Table 4 are most-likely overestimated.

Fe was the most abundant trace element species in particulates collected at Welgegund, Marikana and Rustenburg in South Africa, while Na had the highest mean concentration in the Vaal Triangle. The city of Rustenburg is, similarly than Marikana, located in the western Bushveld Igneous Complex, while the Vaal Triangle is a highly industrialised and densely populated region south of the Johannesburg-Pretoria conurbation. Relatively higher concentrations were reported for Mg, Na, B, Al and Ca at Marikana, while Mn and Cr were the second and third most abundant species at Rustenburg. Fe and K had the second and third highest concentrations at Vaal Triangle. Ca, Cr and Na were the second, third and fourth most abundant species at Welgegund, with trace element concentrations at Welgegund being generally lower compared levels thereof determined in urban areas in South Africa, including trace element levels determined in low-income settlements. Relatively high B levels were also reported for Welgegund. Total trace element concentrations determined at other urban areas in South Africa were similar than total trace element levels determined in outdoor aerosols collected in low-income urban settlements. Ca, Na and Cr concentrations determined in outdoor and indoor particulates in this study were significantly higher than levels thereof determined at the other South African regional and urban sites, especially, Na and Cr levels measured in indoor particulates. Although Fe was not the most abundant species in aerosols collected in low-income settlements, its concentrations were similar than levels thereof determined in other South African sites, with the exception of Rustenburg where significantly higher Fe concentration was reported. Fe and Ca had the highest concentrations in all three size fractions of particulates collected at Welgegund, which is the only other size-resolved assessment of atmospheric trace elements conducted in South Africa. The highest total trace element concentrations were also determined in PM<sub>1</sub> at Welgegund, which were, however, dominated by Fe. Ca levels at Welgegund were higher in the PM<sub>1-2.5</sub> and PM<sub>2.5-10</sub> size fractions.

Total trace element concentrations determined in outdoor aerosols collected in low-income settlements were also similar than total trace element levels determined in other urban regions in Africa and the rest of the world. However, total trace element concentrations were significantly lower in outdoor and indoor particulates sampled at Barcelona, Spain. With the exception of Ca, most trace element concentrations at Barcelona were at least an order of magnitude lower than levels thereof determined in this study and other studies listed in Table 4. Al, Fe and Ca were the most abundant species at Bamako, Mali, while the highest concentrations were reported for Na, Ca, Al and Fe at Dakar, Senegal. Measurements conducted at a regional site within proximity of Beijing, China indicate that Al, Na, K, Fe and Ca were the most abundant species. Al was the most abundant species at Bamako and Beijing, with the Al concentration at Bamako being an order of magnitude higher than levels thereof determined in this study. Ca had the highest concentration in particulates collected at Dakar. Ca, Fe, K and Na had the highest concentrations in particulates collected during outdoor and indoor campaigns at Barcelona. Although trace element concentrations determined at Barcelona were lower than trace element levels determined in low-income urban settlements in this study, higher trace element concentrations are also reported for indoor particulates collected at Barcelona. Wind-blown dust is considered the major source of atmospheric trace elements at these sites located in other parts of the world, while the impacts of marine air masses are also evident at coastal cities (e.g. Dakar).

Existing ambient air quality guidelines and standard limit values for trace element species according to the WHO Air Quality guidelines (WHO, 2005), the European commission Air Quality Standards (ECAQ, 2008) and the South African National Air Quality Standards (DEA, 2009) are also listed in Table 4. Since there are only *annual* average standard values for six of the seven trace elements for which a standard limit value exists, mean trace element levels determined during the respective sampling campaigns at each site in this study cannot be directly compared to these standard limit values. V has a 24-hour standard, which can be related to average V levels determined in 24-hour samples collected during the indoor campaign. In addition, the relatively high total atmospheric Cr concentrations measured in this study in outdoor and indoor aerosols cannot be directly related to the WHO guideline, which is only for atmospheric Cr(VI) with a lifetime risk of 1:1 000 000.



709 **Table 4.** Mean PM<sub>10</sub> trace element concentrations determined during sampling campaigns at low-income settlements in this study; annual  
710 average standard limits; and mean trace element concentrations measured in studies conducted in South Africa and other parts of the world. All  
711 concentrations are presented in µg.m<sup>-3</sup>. Bold typeface indicates concentrations of species that were below the detection limit of the analytical  
712 technique in 75% or more collected samples in all three size fractions (bold italic typeface indicate species below the detection limit in all  
713 samples)

| South Africa |                             |         |                      |         |                    |                          |                     |                      |                 |             |                       |                         |       |                   |                    |         | Other countries |  |  |  |
|--------------|-----------------------------|---------|----------------------|---------|--------------------|--------------------------|---------------------|----------------------|-----------------|-------------|-----------------------|-------------------------|-------|-------------------|--------------------|---------|-----------------|--|--|--|
| Element      | ICP-MS detection            | Kwadela | Kwazankulu (Outdoor) | Zandela | Jouberton (Indoor) | Annual standards         | Welgund             | Marikana             | Vaal Triangle   | Rustenburg  | Bamako no desert dust | Bamako with desert dust | Dakar | Beijing, China    | Barcelona, Spain   | Outdoor |                 |  |  |  |
|              | limits (x10 <sup>-3</sup> ) | 0.0001  | 0.0001               | 0.0001  | 0.0004             |                          | Venter et al., 2017 | Van Zyl et al., 2014 | Kieynhaus, 2008 | Keabi, 2006 | Val et al., 2013      |                         |       | Duan et al., 2012 | Rivas et al., 2014 |         |                 |  |  |  |
| Be           | 1.165                       | 1.12    | 0.0002               | 1.42    | 3.17               |                          | 0.0002              | 0.020                |                 |             | 0.08                  | 0.05                    | 0.03  | 0.10              |                    |         |                 |  |  |  |
| B            | 19.04                       | 4.75    | 7.72                 | 2.69    | 13.75              |                          | 0.28                | 1.300                |                 |             | 0.81                  | 0.20                    | 2.10  | 1.450             | 0.34               | 0.34    |                 |  |  |  |
| Na           | 29.58                       | 0.25    | 1.16                 | 0.75    | 3.12               |                          | 0.38                | 1.410                | 2.800           | 1.370       | 0.96                  | 0.28                    | 0.41  | 0.637             | 0.16               | 0.19    |                 |  |  |  |
| Mg           | 22.09                       | 0.81    | 0.83                 | 0.76    | 3.17               |                          | 0.23                | 2.040                | 1.000           |             | 7.32                  | 2.47                    | 1.20  | 2.180             |                    |         |                 |  |  |  |
| Al           | 65.07                       | 0.76    | 0.04                 | 0.30    | 4.48               |                          | 0.17                | 1.280                |                 |             | 0.11                  | 0.09                    | 0.18  |                   |                    |         |                 |  |  |  |
| P            | 377.3                       | 0.08    | 0.94                 | 0.28    | 1.78               |                          | 0.14                | 0.680                | 1.300           |             | 2.36                  | 0.67                    | 0.51  | 1.170             | 0.37               | 0.4     |                 |  |  |  |
| K            | 406.9                       | 2.66    | 9.50                 | 6.70    | 3.13               |                          | 1.1                 | 1.080                |                 | 0.180       | 2.05                  | 1.10                    | 1.48  | 0.996             | 1.6                | 0.82    |                 |  |  |  |
| Ca           | 93.2                        | 0.09    | 0.08                 | 0.04    | 0.18               |                          | 0.072               | 0.120                | 0.020           | 0.160       | 0.32                  | 0.13                    | 0.07  | 0.059             | 0.055              | 0.059   |                 |  |  |  |
| Ti           | 1.432                       | 0.47    | 0.01                 | 0.01    | 0.11               | 1.000 <sup>a,c</sup>     | 0.037               | 0.040                |                 | 0.009       | 0.009                 | 0.004                   | 0.030 | 0.022             | 0.0048             | 0.0059  |                 |  |  |  |
| V            | 4.466                       | 9.16    | 1.07                 | 0.47    | 9.00               | 2.5 x 10 <sup>-5ab</sup> | 0.5                 | 0.240                | 0.050           | 1.370       | 0.063                 | 0.026                   | 0.026 | 0.022             | 0.0038             | 0.0034  |                 |  |  |  |
| Cr           | 359.9                       | 0.21    | 0.05                 | 0.06    | 0.17               | 0.15 <sup>b</sup>        | 0.026               | 0.060                | 0.120           | 4.390       | 0.063                 | 0.026                   | 0.026 | 0.036             | 0.0012             | 0.0016  |                 |  |  |  |
| Mn           | 4.156                       | 0.88    | 2.13                 | 1.63    | 4.87               |                          | 1.2                 | 2.540                | 1.280           | 9.760       | 4.15                  | 1.98                    | 0.88  | 1.090             | 0.42               | 0.58    |                 |  |  |  |
| Fe           | 60.72                       | 0.11    | 0.004                | 0.003   | 0.19               | 0.020 <sup>c</sup>       | 0.0035              | 0.140                |                 | 0.770       | 0.014                 | 0.004                   | 0.012 | <0.001            | 0.00021            | 0.00022 |                 |  |  |  |
| Co           | 0.625                       | 0.39    | 0.16                 | 0.19    | 1.49               |                          | 0.079               | 0.330                | 0.040           | 0.009       | 0.009                 | 0.005                   | 0.019 | 0.020             | 0.0026             | 0.0033  |                 |  |  |  |
| Ni           | 3.229                       | 0.02    | 0.18                 | 0.06    | 0.47               |                          | 0.069               | 0.180                | 0.050           | 0.210       | 0.037                 | 0.026                   | 0.042 | 0.010             | 0.0082             | 0.0088  |                 |  |  |  |
| Cu           | 4.186                       | 0.16    | 0.24                 | 0.31    | 0.68               |                          | 0.053               | 0.490                | 0.090           | 0.340       | 0.003                 | 0.001                   | 0.005 | 0.027             | 0.052              | 0.055   |                 |  |  |  |
| Zn           | 62.12                       | 0.07    | 0.002                | 0.002   | 0.03               |                          | 0.0084              | 0.260                |                 |             |                       |                         |       | 0.003             | 0.00046            | 0.0005  |                 |  |  |  |
| As           | 5.686                       | 0.01    | 0.01                 | 0.02    | 0.02               |                          | 0.0017              | 0.580                |                 |             |                       |                         |       | 0.001             | 0.00033            | 0.00037 |                 |  |  |  |
| Se           | 8.559                       | 0.002   | 0.01                 | 0.004   | 0.03               |                          | 0.015               |                      |                 |             |                       |                         |       | 0.010             | 0.0046             | 0.0028  |                 |  |  |  |
| Rb           | 0.268                       | 0.01    | 0.08                 | 0.04    | 0.04               |                          | 0.0018              |                      |                 |             |                       |                         |       | 0.007             |                    |         |                 |  |  |  |
| Sr           | 1.238                       | 0.02    | 0.01                 | 0.02    | 0.06               |                          | 0.0005              | 0.410                |                 |             |                       |                         |       |                   |                    |         |                 |  |  |  |
| Mo           | 0.681                       | 0.01    | 0.01                 | 0.03    | 0.03               |                          | 0.0005              |                      |                 |             |                       |                         |       |                   |                    |         |                 |  |  |  |
| Pd           | 0.246                       | 0.03    | 0.58                 | 0.05    | 0.05               |                          | 0.0004              | 0.030                |                 |             |                       |                         |       | <0.001            | 0.00014            | 0.00017 |                 |  |  |  |
| Ag           | 2.447                       | 0.01    | 0.01                 | 0.012   | 0.018              | 0.005 <sup>b,c</sup>     | 0.0013              |                      |                 |             |                       |                         |       | <0.001            | 0.00083            | 0.0011  |                 |  |  |  |
| Cd           | 1.119                       | 0.001   | 0.001                | 0.005   | 0.005              |                          | 0.0040              | 0.140                |                 |             |                       |                         |       | 0.018             | 0.019              | 0.02    |                 |  |  |  |
| Sb           | 0.712                       | 0.09    | 0.17                 | 0.109   | 0.088              |                          | 0.0016              | 0.350                |                 |             |                       |                         |       |                   |                    |         |                 |  |  |  |
| Ba           | 1.670                       | 0.003   | 0.01                 | 0.032   | 0.016              |                          | 0.0031              | 0.380                |                 |             |                       |                         |       |                   |                    |         |                 |  |  |  |
| Pt           | 0.381                       | 0.001   | 0.03                 | 0.007   | 0.191              |                          | 0.0002              | 0.550                |                 |             |                       |                         |       |                   |                    |         |                 |  |  |  |
| Au           | 2.156                       | 0.038   |                      | 0.00003 | 0.037              | 1.000 <sup>b</sup>       | 0.0007              | 0.270                |                 |             |                       |                         |       |                   |                    |         |                 |  |  |  |
| Hg           | 2.836                       | 0.080   | 0.00004              | 0.00003 | 0.0001             |                          | 0.0078              | 0.080                | 0.040           | 0.420       | 0.013                 | 0.0098                  | 0.009 | 0.053             | 0.0073             | 0.0081  |                 |  |  |  |
| Tl           | 0.411                       | 0.587   | 0.080                | 0.067   | 0.070              | 0.5 <sup>b,c,d</sup>     |                     |                      |                 |             |                       |                         |       |                   |                    |         |                 |  |  |  |
| Pb           | 0.309                       | 0.008   | 0.003                | 0.002   | 0.001              |                          |                     |                      |                 |             |                       |                         |       |                   |                    |         |                 |  |  |  |
| Bi           | 0.160                       | 0.00001 | 0.002                | 0.001   | 0.001              |                          | 0.0009              |                      |                 |             |                       |                         |       |                   |                    |         |                 |  |  |  |
| Th           | 0.113                       | 0.0002  | 0.0017               | 0.001   | 0.002              |                          |                     |                      |                 |             |                       |                         |       |                   |                    |         |                 |  |  |  |
| U            |                             |         |                      |         |                    |                          |                     |                      |                 |             |                       |                         |       |                   |                    |         |                 |  |  |  |

715 <sup>a</sup> WHO guideline for Cr(VI) concentrations associated with an excess lifetime risk of 1:1 000 000. <sup>b</sup> WHO air quality guidelines for Europe. <sup>c</sup> European Commission Air Quality Standards. <sup>d</sup> National Air Quality Act of  
716 the South African Department of Environmental Affairs. <sup>e</sup> 24-h limit value

Average concentrations of Ni, As and Cd in outdoor and indoor particulates, as well as average Mn levels determined during the indoor campaign, were higher than annual standard values for these species. However, As and Cd concentrations are most-likely overestimated due to their levels being below the detection limit of the analytical technique in 75% or more of the samples. Average Ni concentrations in indoor samples were two orders of magnitude higher than the annual average European standard, while the average concentration thereof in outdoor samples were an order of magnitude higher. Annual average Ni concentrations determined in aerosols collected at Welgegund and Marikana also exceeded annual standard limits, which was attributed to base metal refining in the Bushveld Igneous Complex (Venter et al., 2017; Van Zyl et al., 2014). In addition, average Ni concentrations in indoor PM<sub>10</sub> were an order of magnitude higher than levels thereof determined at Marikana located within proximity of pyrometallurgical smelters. Mean Mn levels in indoor particulates marginally exceeded the annual average standard. The average V concentration in outdoor and indoor PM<sub>10</sub> were well below the 24-hour V standard value.

Venter et al., (2017) and Van Zyl et al., (2014) also mentioned atmospheric Pb and Hg concentrations determined in aerosols collected at Welgegund and Marikana, respectively. Pb is the only trace element for which a South African air quality standard exists, while it is foreseen that an air quality standard limit for Hg will be prescribed in the very near future in South Africa. Average Pb and Hg levels determined at each site during the respective sampling campaigns were well below the annual average standard limits of these species. In addition, Pb and Hg levels were only detected in 25% or less of the collected samples. Pb concentration were similar than levels determined for Pb at Welgegund, which was at least two orders of magnitude lower than Pb concentrations determined at Marikana, Vaal Triangle and Rustenburg (Van Zyl et al., 2014; Kgabi, 2006; Kleynhans, 2008). Hg was below the detection limit of the analytical technique for the entire sampling periods at Welgegund and Marikana.

### **3.4 Carbonaceous aerosols**

In Figure 8, OC and EC concentrations determined in the three aerosol size fractions at each site during the respective sampling campaigns are presented, while the mean OC/EC ratios calculated are also indicated. The highest average OC and EC concentrations were determined in the PM<sub>1</sub> size fraction of all aerosol samples collected during respective

sampling campaigns conducted at each site in this study, with mean OC and EC levels being significantly higher (4 times up to an order of magnitude higher) than levels thereof in the PM<sub>1-2.5</sub> and PM<sub>2.5-10</sub> size fractions of particulates collected during the two indoor campaigns, the winter outdoor campaign and the summer outdoor campaign at Kwadela. Similar OC and EC levels were measured in PM<sub>1-2.5</sub> and PM<sub>2.5-10</sub> for all sampling campaigns, with the exception of ~3 times higher OC and EC concentrations determined in these two larger size fractions during the winter indoor campaign. The lowest average OC and EC concentrations were determined in the PM<sub>1-2.5</sub> size fraction for all sampling campaigns.

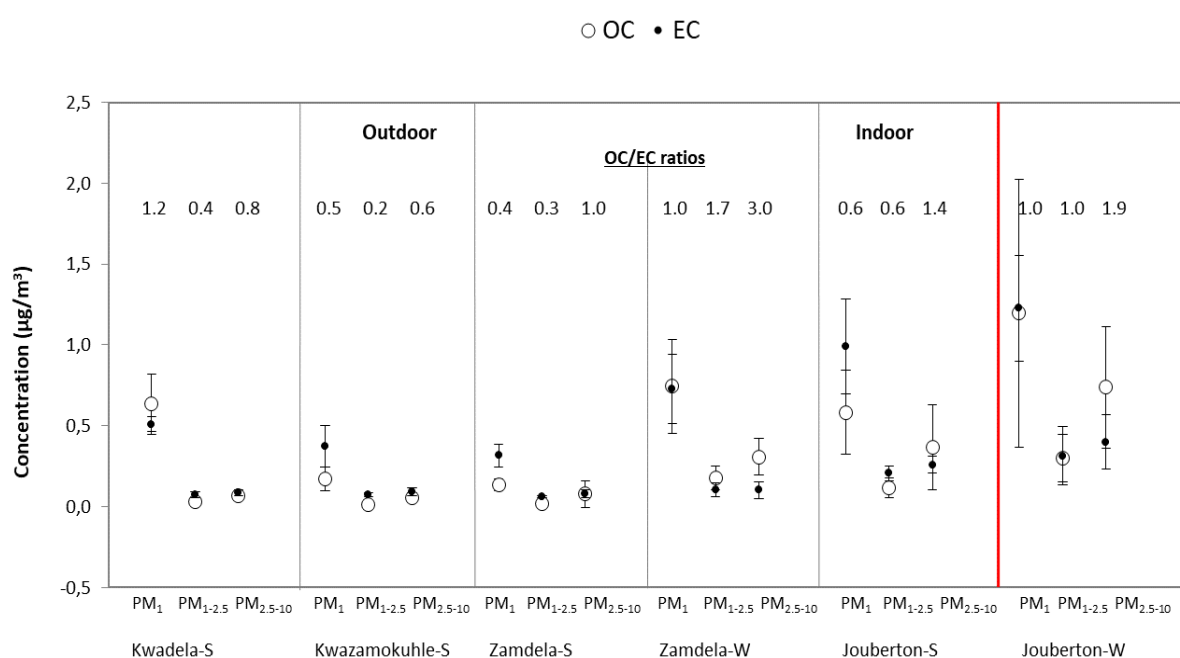

**Figure 8:** Mean OC and EC concentrations ( $\pm$  standard deviation) measured in PM<sub>1</sub>, PM<sub>1-2.5</sub> and PM<sub>2.5-10</sub> at each site during respective sampling campaigns, together with mean OC/EC ratios

The highest mean OC and EC levels were measured in PM<sub>1</sub> collected during the winter indoor campaign. Moderately lower average EC concentrations were determined in the PM<sub>1</sub> size fraction of particulates collected during the summer indoor campaign, while mean OC levels in PM<sub>1</sub> sampled during the summer indoor campaign were significantly lower than average OC concentrations determined for the winter indoor campaign. Mean OC and EC levels measured in PM<sub>1</sub> collected during the winter outdoor sampling campaign at Zamdela were significantly higher than average OC and EC concentrations determined during summer

outdoor campaigns at Zamdela and Kwazamokuhle where similar OC and EC levels were measured. Mean OC and EC levels in  $PM_1$  collected during the summer outdoor campaign at Kwadela were higher than OC and EC concentrations determined in  $PM_1$  during the other two summer outdoor campaigns, but lower than OC and EC levels in  $PM_1$  sampled during the winter outdoor campaign at Zamdela. Ambient EC concentrations determined during winter at Zamdela were moderately lower than EC levels measured during the summer indoor campaign, while higher average OC concentrations were determined in aerosols collected during the winter outdoor campaign at Zamdela compared to OC levels determined for the summer indoor campaign at Jouberton. Ambient OC and EC concentrations determined in  $PM_{2.5}$  collected at four sites regionally representative of the north-eastern interior of South Africa indicated higher OC and EC concentrations during the dry winter season compared to levels thereof during the wet warmer season, especially at two sites, i.e. Vaal Triangle and Amersfoort, within proximity of anthropogenic sources (Maritz et al., 2019). Josipovic et al., (2019) also reported higher OC and EC concentrations during the dry season at Vaal Triangle. Higher OC and EC concentrations during winter at these sites were attributed to changes in meteorology (e.g. occurrence of low-level inversion layers), as well as increased emissions associated with household combustion and open biomass burning.

It is also evident from Figure 8 and the OC/EC ratios that EC concentrations were generally higher than OC levels in each size fraction of aerosols collected during the three summer outdoor campaigns at low-income settlements (with the exception of higher OC in  $PM_1$  collected at Kwadela). An increase in OC concentrations in relation to EC levels is observed in winter outdoor particulates when compared to summer (ambient) aerosols in all three size fractions (especially in  $PM_{1-2.5}$  and  $PM_{2.5-10}$ ). EC concentrations were higher than OC levels in the  $PM_1$  and  $PM_{1-2.5}$  size fractions of summer indoor aerosols, while an increase in OC levels with regard to EC concentrations is also observed in all three size fractions of indoor particulates collected during winter. Lower OC/EC ratios are related to fresher emissions of OC and EC (e.g. Aurela et al., 2011), since concentrations of primary emitted EC reduce due to deposition, while secondary formation of OC contribute to increased OC levels in aged air masses. Therefore, OC/EC ratios reported for aerosol samples collected in low-income urban settlements in this study reflects OC and EC associated with local sources of these pollutants. In addition, OC/EC ratios calculated in this study also indicate a lower impact from traffic emissions (Adon et al., 2020). OC/EC ratios reported for  $PM_{2.5}$  at four sites regionally representative of the north-eastern interior of South Africa were lower for sites within

proximity of anthropogenic sources (Maritz et al., 2019). In addition, OC/EC ratios presented for these sites by Maritz et al., (2019) were significantly higher (ranged between 2.9 and 6.4) than OC/EC ratios reported in this study for low-income informal settlements with the exception of the OC/EC ratio calculated in PM<sub>2.5-10</sub> collected during the winter outdoor campaign (3.0), which were similar than the OC/EC ratio determined at the highly industrialised and densely populated Vaal Triangle site (2.9).

In Figure 9, SO<sub>4</sub><sup>2-</sup>/EC, EC/total particulate matter (TPM) and SO<sub>4</sub><sup>2-</sup>/TPM, which can also be indicative of sources of aerosols, are presented for particulate samples collected during the respective sampling campaigns at each site. The predominance of SO<sub>4</sub><sup>2-</sup> in the PM<sub>1</sub> size fraction is reflected by these ratios, with the SO<sub>4</sub><sup>2-</sup>/EC ratio also indicating significantly higher SO<sub>4</sub><sup>2-</sup> concentrations than EC levels in PM<sub>1</sub>. However, substantially lower SO<sub>4</sub><sup>2-</sup> levels in PM<sub>1-2.5</sub> and PM<sub>2.5-10</sub> are also reflected in these ratios with EC concentrations exceeding SO<sub>4</sub><sup>2-</sup> levels in most instances in the two larger size fractions. A larger contribution from EC in relation to SO<sub>4</sub><sup>2-</sup> and TPM is also observed in indoor PM<sub>1</sub> compared to outdoor PM<sub>1</sub>. Although the impact of local sources associated with domestic fuel burning is evident for aerosols collected in low-income urban settlements, the regional impacts of emissions related to industrial combustion are also signified by these ratios presented in Figure 9.

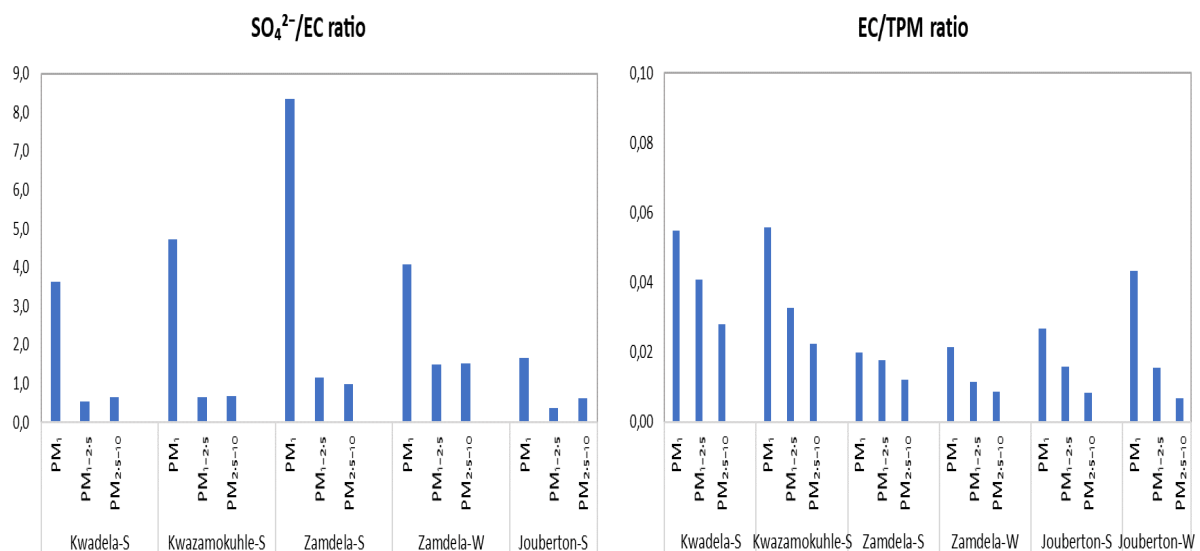

(a)

(b)

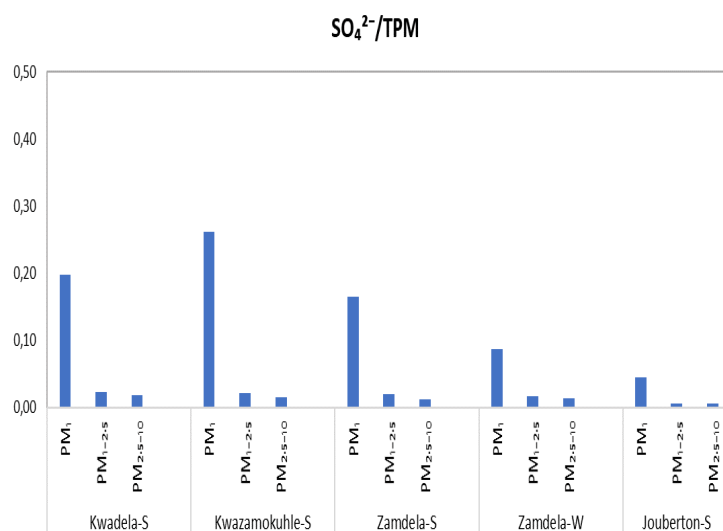

(c)

**Figure 9:** Ratios between major compounds in PM<sub>1</sub>, PM<sub>1-2.5</sub> and PM<sub>10</sub> collected during outdoor and indoor sampling campaigns. (a) SO<sub>4</sub><sup>2-</sup>/EC, (b) EC/TMP (c) SO<sub>4</sub><sup>2-</sup>/ TPM in three size fractions.

In Table 5 OC and EC concentrations determined for low-income settlements in this study is contextualised with other OC and EC measurements conducted in South Africa, as well as other parts of the world. OC levels determined in this study for outdoor and indoor particulates were an order of magnitude lower than OC concentrations determined for ambient PM<sub>2.5</sub> collected at four sites located in the north-eastern interior of South Africa, while similar EC concentrations were determined, with the exception of significantly higher EC levels measured at the Vaal Triangle (Maritz et al., 2019; Chiloane et al., 2017). However, OC and EC levels determined for PM<sub>1</sub> in this study were similar than OC and EC concentrations reported by Josipovic et al., (2010) for PM<sub>1</sub> collected at the Vaal Triangle. Josipovic et al., (2019) also indicated higher OC and EC concentrations in the PM<sub>1</sub> size fraction compared to the larger size fractions. OC and EC concentrations measured in PM<sub>1-2.5</sub> and PM<sub>2.5-10</sub> for low-income settlements were significantly lower (at least an order of magnitude) than OC and EC levels determined in other sites in South Africa.

Significantly higher OC and EC concentrations are determined for urban areas in other countries in Africa and the rest of the world than OC and EC levels determined in this study and other studies in South Africa. OC and EC concentrations determined at Abidjan, Côte d'Ivoire and Cotonou, Benin were between an order- and two orders of magnitude higher

846 than levels thereof measured in low-income urban settlements, with, especially, OC  
847 concentrations being substantially higher. OC and EC levels in Barcelona, Spain were similar  
848 than OC and EC concentrations determined at Cotonou, Benin. OC and EC measured at  
849 urban regions in China and India were also between an order- and two orders of magnitude  
850 higher than levels thereof determined in this study. This is also in agreement with studies in  
851 other parts of the world where indoor and outdoor OC and EC concentrations were measured  
852 with similar levels of OC and EC reported. However, outdoor OC and EC concentrations  
853 determined at Barcelona, Spain, were approximately two times lower than indoor OC and EC  
854 concentrations determined in this study. OC and EC levels at a remote site in the Himalayan  
855 region in India were significantly lower than that measured in urban areas in other parts of the  
856 world. However, OC and EC concentrations for this remote site were still higher than levels  
857 thereof measured in low-income settlements in this study.

858 **Table 5.** Mean OC and EC concentrations ( $\mu\text{g.m}^{-3}$ ) determined at low-income settlements in  
859 this study, as well as in other studies in South Africa and the rest of the world

| Source                   | Period          | Place                   | Area    |                                  | OC    | EC   |
|--------------------------|-----------------|-------------------------|---------|----------------------------------|-------|------|
| This study               | 03/2015-03/2017 | Kwadela                 | Outdoor | Mean PM <sub>1</sub>             | 0,63  | 0,51 |
|                          |                 |                         |         | Mean PM <sub>1-2,5</sub>         | 0,03  | 0,07 |
|                          |                 |                         |         | Mean PM <sub>2,5-10</sub>        | 0,07  | 0,09 |
|                          |                 | Kwazamokuhle            | Outdoor | Mean PM <sub>1</sub>             | 0,17  | 0,37 |
|                          |                 |                         |         | Mean PM <sub>1-2,5</sub>         | 0,02  | 0,08 |
|                          |                 |                         |         | Mean PM <sub>2,5-10</sub>        | 0,06  | 0,09 |
|                          |                 | Zamdela                 | Outdoor | Mean PM <sub>1</sub>             | 0,44  | 0,52 |
|                          |                 |                         |         | Mean PM <sub>1-2,5</sub>         | 0,10  | 0,08 |
|                          |                 |                         |         | Mean PM <sub>2,5-10</sub>        | 0,19  | 0,09 |
|                          |                 | Jouberton               | Indoor  | Mean PM <sub>1</sub>             | 0,89  | 1,11 |
|                          |                 |                         |         | Mean PM <sub>1-2,5</sub>         | 0,21  | 0,26 |
|                          |                 |                         |         | Mean PM <sub>2,5-10</sub>        | 0,55  | 0,33 |
| South Africa             |                 |                         |         |                                  |       |      |
| Chiloane et al., (2017)  | 03/2009-04/2011 | Louis Trichardt         | Outdoor | Mean PM <sub>10</sub>            |       | 0,90 |
|                          |                 | Skukuza                 | Outdoor | Mean PM <sub>10</sub>            |       | 1,10 |
|                          |                 | Vaal Triangle           | Outdoor | Mean PM <sub>10</sub>            |       | 4,40 |
|                          |                 | Amersfoort              | Outdoor | Mean PM <sub>10</sub>            |       | 1,40 |
|                          |                 | Botsalano               | Outdoor | Mean PM <sub>10</sub>            |       | 0,90 |
| Maritz et al., (2019)    | 03/2009-12/2015 | Louis Trichardt         | Outdoor | Mean PM <sub>2,5</sub>           | 3,8   | 0,7  |
|                          |                 | Skukuza                 | Outdoor | Mean PM <sub>2,5</sub>           | 6,9   | 1,1  |
|                          |                 | Vaal Triangle           | Outdoor | Mean PM <sub>2,5</sub>           | 9,3   | 3,2  |
|                          |                 | Amersfoort              | Outdoor | Mean PM <sub>2,5</sub>           | 6.0   | 1.2  |
| Josipovic et al., (2019) | 03-10/2012      | Vaal Triangle           | Outdoor | Mean PM <sub>1</sub> WS          | 0,41  | 0,32 |
|                          |                 |                         |         | Mean PM <sub>1-&gt;=2,5</sub> WS | 0,18  | 0,23 |
|                          |                 |                         |         | Mean PM <sub>1</sub> DS          | 0,66  | 0,51 |
|                          |                 |                         |         | Mean PM <sub>1-&gt;=2,5</sub> DS | 0,43  | 0,24 |
| Other countries          |                 |                         |         |                                  |       |      |
| Djossou et al., (2018)   | 02/2015-03/2017 | Abidjan, Côte d'Ivoire  | Outdoor | Mean PM <sub>2,5</sub>           | 31,0  | 8,67 |
|                          |                 | Cotonou, Benin          | Outdoor | Mean PM <sub>2,5</sub>           | 8,0   | 2,0  |
| Rivas et al., (2014)     | 0/2012-02/2013  | Barcelona, Spain        | Indoor  | Mean PM <sub>2,5</sub>           | 10    | 1,3  |
|                          |                 |                         | Outdoor | Mean PM <sub>2,5</sub>           | 5,5   | 1,3  |
| Ho et al., (2004)        |                 | Hong Kong               | Indoor  | Mean PM <sub>2,5</sub>           | 11,3  | 4,8  |
|                          |                 |                         | Outdoor | Mean PM <sub>2,5</sub>           | 12,6  | 6,4  |
| Cao et al., (2012)       | 07/2004-01/2005 | Guangzhou, China        | Indoor  | Mean PM <sub>2,5</sub>           | 21,75 | 7,6  |
|                          |                 |                         | Outdoor | Mean PM <sub>2,5</sub>           | 21,9  | 7,9  |
| Xu et al., (2015)        | 03/2015         | Xi'an, China            | Indoor  | Mean PM <sub>2,5</sub>           | 22,5  | 7,9  |
|                          |                 |                         | Outdoor | Mean PM <sub>2,5</sub>           | 24,9  | 8,8  |
| Joseph et al., (2012)    | 2007-2008       | Coloba, Mumbai (India)  | Outdoor | Mean PM <sub>2,5</sub>           | 20,40 | 5,00 |
|                          |                 | Dadar, Mumbai (India)   | Outdoor | Mean PM <sub>2,5</sub>           | 28,40 | 9,20 |
|                          |                 | Khar, Mumbai (India)    | Outdoor | Mean PM <sub>2,5</sub>           | 31,30 | 7,70 |
|                          |                 | Mahul, Mumbai (India)   | Outdoor | Mean PM <sub>2,5</sub>           | 29,10 | 7,20 |
| Sharma et al., (2020)    | 10/2018-02/2019 | Himalayan region, India | Outdoor | Mean PM <sub>10</sub>            | 3,91  | 1,24 |



### 3.5 Aerosol chemical mass closure

Concentrations of inorganic and organic species determined for particulates collected in low-income urban settlements can be used to perform aerosol chemical mass closure. However, as previously mentioned, a limitation of the ICP-MS analytical technique used in this study to determine trace element concentrations is that Si levels cannot be quantified, which is important to establish the contribution of dust to the total aerosol load. There are, however, several methods to estimate dust concentrations by utilising concentrations of other species determined with IC and ICP-MS. Two methods commonly used to estimate dust concentrations are the methods described by Guinot et al., (2007) and Terzi et al., (2010) (e.g. Adon et al., 2020).

Guinot et al., (2007) proposed a simplified method to perform chemical mass closure for fine ( $PM_{1-2.5}$ ) and coarse ( $PM_{2.5-10}$ ) particulates in which the mass of EC, particulate organic matter (POM), inorganic ions and dust are considered. Experimentally determined OC concentrations are converted to POM levels with a conversion factor,  $k$ , which in this study was fixed to 1.8 (Guinot et al., 2007; Adon et al., 2020). Dust concentrations are calculated from  $Ca^{2+}$  levels and a conversion factor,  $f$ , which is the correlation coefficient between  $Ca^{2+}$  concentrations and missing mass, i.e. mass difference between the weighted mass and the mass reconstructed from analysed species (EC, POM and inorganic ions). The total mass reported for inorganic ions in this method excludes  $Ca^{2+}$ , while water-soluble organic acids are accounted for in the POM mass.

The Terzi et al., (2010) method utilises concentrations of trace elements, considered to be major constituents of dust, to estimate dust levels according to the following expression:

$$\text{dust} = 1.89[Al] + 2.14[Si] + 1.95[Ca] + 1.42[Fe] + 1.7[Ti] + 1.21[K] + 1.66[Mg] \quad (2)$$

with Si concentrations estimated by the relationship  $2.03 \times Al$  according to Chiapello et al., (1997). A conversion factor of 1.8 was also used to convert OC levels to POM concentrations. Trace element species not included in the estimation of dust concentrations were converted to their corresponding oxides and also considered for chemical mass closure.

Dust concentrations determined in  $PM_{1-2.5}$  and  $PM_{2.5-10}$  with the two methods are listed in Table 6 (Guinot et al., 2007 method can only be applied to these two size fractions). As previously mentioned, the concentrations of inorganic ions and trace elements could not be determined for the winter indoor campaign at Jouberton due to instrument failure. Therefore

chemical mass closure could not be performed for this sampling campaign. In general, a relatively good correlation ( $R^2 = 0.80$ ) is observed between dust concentration calculated with the two methods, with the exception of moderately large differences in dust levels estimated for the Kwazamokuhle summer outdoor campaign and in  $PM_{2.5-10}$  collected during the summer indoor campaign at Jouberton. Higher dust concentrations estimated with the Terzi et al., (2010) method compared to the Guinot et al., (2007) method could be expected due to ICP-MS measuring soluble and insoluble Ca, while the concentrations of other species are also considered in the calculation. However, lower dust concentrations estimated with the method of Terzi et al., (2010) in relation to the method of Guinot et al., (2007) can be attributed to ICP-MS measuring lower concentrations for trace elements included in Equation 2 due to these species being associated with silicates, as previously mentioned.

**Table 6.** Dust concentrations ( $\mu\text{g}\cdot\text{m}^{-3}$ ) estimated according to the methods of Guinot et al., (2007) and Terzi et al., (2010)

| Site           | Size fraction | Guinot et al., 2007 | Terzi et al., 2010 |
|----------------|---------------|---------------------|--------------------|
| Kwadela-S      | $PM_{1-2.5}$  | 0,9                 | 1,9                |
|                | $PM_{2.5-10}$ | 2,1                 | 2,6                |
| Kwazamokuhle-S | $PM_{1-2.5}$  | 1,7                 | 8,3                |
|                | $PM_{2.5-10}$ | 2,7                 | 7,0                |
| Zamdela-S      | $PM_{1-2.5}$  | 1,4                 | 1,4                |
|                | $PM_{2.5-10}$ | 2,9                 | 2,6                |
| Zamdela-W      | $PM_{1-2.5}$  | 8,3                 | 9,6                |
|                | $PM_{2.5-10}$ | 9,5                 | 7,4                |
| Jouberton-S    | $PM_{1-2.5}$  | 7,9                 | 7,3                |
|                | $PM_{2.5-10}$ | 21,0                | 12,6               |

The results from the chemical mass closure performed with the two methods described above are presented in Table 7 and 8. Percentage contributions from dust and trace elements calculated with the Terzi et al., (2010) methods exceeding 100% are due to overestimations of the concentrations of these species as indicated by the negative values of the missing mass (reconstructed mass minus weighted mass). High  $\text{Ca}^{2+}$  concentrations contributed to overestimation of dust at Kwadela and Kwazamokuhle, while high levels of, especially, the oxides of Na, Cr and B lead to trace element concentrations being overestimated at these two sites. In addition, high concentrations were calculated for Ca-, B- and Na oxides at Zamdela, while the levels of the oxides of B, Na, Cr and P were high at Jouberton. It is evident that dust is the major constituent in all size fractions of aerosols collected during respective outdoor and indoor campaigns according to these estimations. The second largest contribution were from “not determined” species according to the Guinot et al., (2007)

method, while the Terzi et al., (2010) method indicated the second most abundant species to be trace elements. Therefore the largest fraction of species not determined with the Guinot et al., (2007) method are most-likely trace elements. Trace elements were the most abundant species in  $PM_1$  and  $PM_{1-2.5}$  collected during the summer indoor campaign with substantially higher contribution to aerosol mass. Inorganic ions were the third most abundant species calculated with both methods, with a significantly larger contribution to aerosols mass determined for these species with the Terzi et al., (2010) method in the  $PM_1$  size fraction of aerosols collected during the outdoor campaigns. EC and POM had the lowest contribution to aerosol mass in all size ranges of particulates collected during all the respective sampling campaigns. No significant differences are observed in the chemical composition of particulates collected during the winter and summer outdoor campaigns at Zamdela.

| Site           | Size fraction        | EC (%) | POM (%) | Inorganic ions (%) | Dust (%) | Not determined (%) | PM mass (µg/m <sup>3</sup> ) | Reconstructed mass (µg/m <sup>3</sup> ) | Missing mass (µg/m <sup>3</sup> ) |
|----------------|----------------------|--------|---------|--------------------|----------|--------------------|------------------------------|-----------------------------------------|-----------------------------------|
| Kwadela-S      | PM <sub>1-2.5</sub>  | 4,1    | 3,2     | 7,6                | 46,6     | 38,5               | 1,8                          | 1,1                                     | 0,7                               |
|                | PM <sub>2.5-10</sub> | 2,8    | 4,1     | 7,0                | 69,3     | 16,7               | 3,1                          | 2,5                                     | 0,5                               |
| Kwazamokuhle-S | PM <sub>1-2.5</sub>  | 3,3    | 1,5     | 7,1                | 71,3     | 16,7               | 2,4                          | 2,0                                     | 0,4                               |
|                | PM <sub>2.5-10</sub> | 2,2    | 3,1     | 6,8                | 64,4     | 23,5               | 4,2                          | 3,2                                     | 1,0                               |
| Zamdela-S      | PM <sub>1-2.5</sub>  | 2,8    | 2,0     | 11,9               | 64,6     | 18,8               | 2,2                          | 1,8                                     | 0,4                               |
|                | PM <sub>2.5-10</sub> | 1,7    | 3,0     | 8,1                | 59,9     | 27,3               | 4,8                          | 3,5                                     | 1,3                               |
| Zamdela-W      | PM <sub>1-2.5</sub>  | 0,7    | 2,1     | 5,5                | 55,1     | 36,6               | 15,1                         | 9,6                                     | 5,5                               |
|                | PM <sub>2.5-10</sub> | 0,8    | 4,4     | 7,8                | 75,8     | 11,2               | 12,5                         | 11,1                                    | 1,4                               |
| Jouberton-S    | PM <sub>1-2.5</sub>  | 1,6    | 1,6     | 5,5                | 59,5     | 31,8               | 13,3                         | 9,1                                     | 4,2                               |
|                | PM <sub>2.5-10</sub> | 0,8    | 2,1     | 3,9                | 67,2     | 26,0               | 31,2                         | 23,1                                    | 8,1                               |

| Site          | Size fraction        | EC (%) | POM (%) | Inorganic ions (%) | Dust (%) | Trace elements (%) | Not determined (%) | PM mass (µg/m³) | Reconstructed mass (µg/m³) | Missing mass (µg/m³) |
|---------------|----------------------|--------|---------|--------------------|----------|--------------------|--------------------|-----------------|----------------------------|----------------------|
| Kwadela-S     | PM <sub>1</sub>      | 5,5    | 12,2    | 29,9               | 82,1     | 169,8              | -199,5             | 9,3             | 28,6                       | -19,3                |
|               | PM <sub>1-2,5</sub>  | 4,1    | 3,2     | 7,6                | 103,4    | 244,9              | -263,2             | 1,8             | 6,7                        | -4,9                 |
|               | PM <sub>2,5-10</sub> | 2,8    | 4,1     | 7,0                | 83,2     | 211,7              | -211,7             | 3,1             | 9,6                        | -6,6                 |
| Kwazankuhle-S | PM <sub>1</sub>      | 5,6    | 4,7     | 40,0               | 186,2    | 92,6               | -229,2             | 7,8             | 26,0                       | -18,2                |
|               | PM <sub>1-2,5</sub>  | 3,3    | 1,5     | 7,1                | 353,0    | 106,4              | -371,3             | 2,3             | 11,1                       | -8,7                 |
|               | PM <sub>2,5-10</sub> | 2,2    | 3,1     | 6,8                | 166,9    | 67,9               | -146,9             | 4,2             | 10,4                       | -6,2                 |
| Zandela-S     | PM <sub>1</sub>      | 3,1    | 2,4     | 37,5               | 54,5     | 45,5               | -43,0              | 10,2            | 14,7                       | -4,5                 |
|               | PM <sub>1-2,5</sub>  | 2,8    | 2,0     | 12,0               | 66,1     | 34,9               | -17,8              | 2,2             | 2,6                        | -0,4                 |
|               | PM <sub>2,5-10</sub> | 1,7    | 3,0     | 8,1                | 55,0     | 59,0               | -26,8              | 4,8             | 6,1                        | -1,4                 |
| Zandela-W     | PM <sub>1</sub>      | 2,7    | 4,9     | 23,8               | 61,7     | 25,9               | -19,0              | 27,4            | 33,4                       | -5,9                 |
|               | PM <sub>1-2,5</sub>  | 0,7    | 2,1     | 5,5                | 63,8     | 18,7               | 9,3                | 15,1            | 13,9                       | 1,2                  |
|               | PM <sub>2,5-10</sub> | 0,8    | 4,4     | 7,8                | 59,7     | 19,7               | 7,6                | 12,5            | 11,8                       | 0,6                  |
| Jouberton-S   | PM <sub>1</sub>      | 2,7    | 2,8     | 9,9                | 55,5     | 92,1               | -63,0              | 36,9            | 60,8                       | -23,9                |
|               | PM <sub>1-2,5</sub>  | 1,6    | 1,6     | 5,5                | 55,3     | 78,9               | -42,9              | 13,3            | 19,1                       | -5,8                 |
|               | PM <sub>2,5-10</sub> | 0,8    | 2,1     | 3,9                | 40,3     | 34,8               | 18,1               | 31,2            | 25,9                       | 5,3                  |

#### 4 Summary and conclusions

Size-resolved concentrations of inorganic- and water-soluble organic ions, trace element species, as well as OC and EC were determined for outdoor and indoor PM collected during winter and summer sampling campaigns conducted at low-income urban settlements in South Africa. Particulate mass concentrations were higher for indoor samples compared to aerosol mass concentrations determined for outdoor samples, while higher PM mass concentrations were measured for samples collected during winter. PM<sub>1</sub> had the highest mass concentrations in all outdoor aerosol samples collected during winter and summer, as well as in indoor samples collected during summer. The highest aerosols mass concentration was, however, determined in the PM<sub>2.5-10</sub> size fraction of aerosols sampled during the winter indoor campaign.

Significantly higher concentrations were determined for SO<sub>4</sub><sup>2-</sup> at each site during the respective sampling campaigns, while NH<sub>4</sub><sup>+</sup> and NO<sub>3</sub><sup>-</sup> were the second most abundant species. SO<sub>4</sub><sup>2-</sup> and NH<sub>4</sub><sup>+</sup> almost exclusively occurred in the PM<sub>1</sub> size fraction, while NO<sub>3</sub><sup>-</sup> was the major constituent in the larger size fractions. The highest SO<sub>4</sub><sup>2-</sup> levels were recorded for the winter and summer outdoor campaigns conducted at Zamdela, while significantly higher NO<sub>3</sub><sup>-</sup> levels were determined for the winter outdoor and summer indoor campaigns. NH<sub>4</sub><sup>+</sup> concentration recorded for the winter outdoor campaign were significantly higher than levels thereof determined in PM collected during other sampling campaigns. Estimations of acidity of PM<sub>1</sub> indicated that all outdoor and indoor PM<sub>1</sub> were acidic. The concentrations of inorganic ions and water-soluble OAs determined in this study were similar than ambient levels thereof determined in other studies conducted in South Africa, which signifies the regional impacts of anthropogenic emissions in the north-eastern interior of South Africa. The extent to which particulate inorganic ionic content is dominated by SO<sub>4</sub><sup>2-</sup> in South Africa is unique and not observed for other parts of the world. The influence of regional open biomass burning was also observed through increased Cl<sup>-</sup> and K<sup>+</sup> levels in PM<sub>1</sub> collected during the winter outdoor campaign.

The highest total trace element concentrations were determined for aerosols collected during the indoor campaign, while total trace element levels in PM<sub>1</sub> were substantially higher than levels thereof in the two larger size fractions of particulates collected during all sampling campaigns. More than 70% of trace element species occurred in the PM<sub>1</sub> and PM<sub>1-2.5</sub> size fractions, which is also indicative of the regional impacts of industrial sources. Although no

significant seasonal pattern was observed for trace element species, higher Ca levels contributed to relatively higher total trace element concentrations during the winter outdoor campaign at Zamdela. Na and Ca had the highest concentrations in all three size fractions of aerosols collected during the outdoor campaigns conducted at Kwazamokuhle and Zamdela, while Na and Cr had the highest levels in particulates collected during the summer outdoor campaign at Kwadela and the indoor campaign at Jouberton. In most other studies conducted in South Africa, Fe was found to be most abundant species in ambient aerosols, while one other size-resolved study conducted also indicated higher trace element concentrations in the PM<sub>1</sub> size fraction. Ni concentrations in outdoor and indoor PM exceeded the annual average European standard, with Ni levels in indoor PM<sub>10</sub> being an order of magnitude higher than levels thereof determined at a site within proximity of large pyrometallurgical smelters. Indoor Mn also marginally exceeded the annual average standard.

OC and EC concentrations were the highest in PM<sub>1</sub> collected during each sampling campaign conducted in this study with the highest OC and EC levels determined in PM<sub>1</sub> collected during the winter indoor campaign. OC and EC levels also revealed a seasonal pattern with significantly higher concentration measured during winter, which corresponds to other studies conducted in South Africa that attributed trends in OC and EC concentrations to changes in meteorological patterns and increased biomass burning during winter. Low OC/EC ratios determined for particulates collected in low-income urban settlements revealed that EC concentrations were generally higher than OC levels, which is indicative of OC and EC being mainly associated with local sources of these species. OC concentrations determined in this study were an order of magnitude lower than OC concentrations determined for ambient aerosols collected in the north-eastern interior of South Africa, while similar EC levels were measured. However, OC and EC concentrations determined for urban areas in other countries in Africa and the rest of the world were significantly higher than OC and EC levels determined in general for South Africa.

Estimation of chemical mass closure according to two methods revealed dust to be the major constituent in all size fractions of particulates collected during the respective outdoor and indoor campaigns, while trace element species were the second most abundant. However, trace elements made the highest contribution to aerosol mass in PM<sub>1</sub> and PM<sub>1-2.5</sub> collected during the indoor campaign. No clear season pattern was observed in the chemical composition of particulates sampled in low-income urban settlements.

## **5 Data availability**

At the moment, the dataset is being registered in Figshare. For the period of review, the link to the datasets is available in the section “Assets for review” of the MS Records system. As soon as the manuscript is approved for publication and the permanent DOI number is received, it will be indicated in the manuscript.

### **Assets for review**

<https://drive.google.com/drive/folders/1xJdYa06WMJyBm0OWbhoaBPkSpOgrt6j9?usp=sharing>

**Authors’ contributions:** CKS, PGvZ, CL and JPB were the main investigators in this study and wrote the manuscript. CKS conducted this study as part of her PhD degree, as well as performed most of the experimental work and data processing. The project was led by PGvZ, CL and JPB, which were also study leaders of the PhD. J-SS, MD-A and EG assisted with analyses of aerosol samples, while BL assisted with aerosol sample collection. RPB and SJP provided infrastructure for sampling campaigns and made conceptual contributions.

**Competing interests:** The authors declare that they have no conflict of interest.

### **Acknowledgements**

The authors wish to thank the National Research Foundation (NRF) for financial assistance, while the Atmospheric Research in Southern Africa and Indian Ocean (ARSAIO) project is also acknowledged for its contribution to this study. The Prospective Household cohort study of Influenza, Respiratory Syncytial virus and other respiratory pathogens community burden and Transmission dynamics in South Africa (PHIRST) study is also acknowledged. Mr Jacques Adon is also thanked for his assistance with OC and EC analysis, as well as Mr Johan Hendriks for conducting ICP-MS analysis.



## References

- Adgate, J. L., Mongin, S. J., Pratt, G. C., Zhang, J., Field, M. P., Ramachandran, G., and Sexton, K.: Relationships between personal, indoor, and outdoor exposures to trace elements in PM<sub>2.5</sub>, *Sci. Total Environ.*, 386, 21–32, <https://doi.org/10.1016/j.scitotenv.2007.07.007>, 2007.
- Adon, A. J., Liousse, C., Doumbia, E. T., Baeza-Squiban, A., Cachier, H., Léon, J., Yoboué, V., Akpo, A.B., Galy-Lacaux, C., Guinot, B., Zouiten, C., Xu, H., Gardrat, E., and Keita, S.: Physico-chemical characterization of urban aerosols from specific combustion sources in West Africa at Abijan in Côte d’Ivoire and Cotonou in Benin in the frame of the DACCIWA program. *Atmos. Chem. Phys.*, 20, 5327–5354, <https://doi.org/10.5194/acp-20-5327-2020>, 2020.
- Ahn, J. W., Chung, D. W., Lee, K. W., Ahn, J., and Sohn, H. Y.: Nitric Acid Leaching of Base Metals from Waste PDP Electrode Scrap and Recovery of Ruthenium Content from Leached Residues. *Mater. Trans.*, 52, 1063–1069, 2011.
- Aurela, M., Beukes, J.P., Van Zyl, P.G., Vakkari, V., Teinilä, K., Saarikoski, S., Laakso, L.: The composition of ambient and fresh biomass burning aerosols at a savannah site, South Africa. *S. Afr. J. Sci.* 112 (5/6), Art. #2015–0223, 8 pages, <https://doi.org/10.17159/sajs.2016/20150223>, 2016.
- Besombes, J.-L., Maître, A., Patissier, O., Marchand, N., Chevron, N., Stoklov, M. and Masclet, P.: Particulate PAHs observed in the surrounding of a municipal incinerator. *Atmos. Environ.*, 35 (35), 6093–6104, [https://doi.org/10.1016/S1352-2310\(01\)00399-5](https://doi.org/10.1016/S1352-2310(01)00399-5), 2001.
- Bressi, M., Sciare, J., Gherzi, V., Bonnaire, N., Nicolas, J., Petit, J.-E., Moukhtar, S., Rosso, A., Mihalopoulos, N. & Féron, A.: A one-year comprehensive chemical characterisation of fine aerosol (PM<sub>2.5</sub>) at urban, suburban and rural background sites in the region of Paris (France). *Atmos. Chem. Phys.*, 13, 7825–7844. <https://doi.org/10.5194/acp-13-7825-2013>, 2013.
- Bruce, N., Perez-padilla, R. and Albalak, R.: Indoor air pollution in developing countries: a major environmental and public health challenge. *Bulletin of the World Health Organization*. 78. 1078–1092, 2000.

1058 Cao, J. J., Huang, H., Lee, S. C., Chow, J. C., Zou, C. W., Ho, K. F., and Watson, J. G.:  
 1059 Indoor/Outdoor Relationship for Organic and Elemental Carbon in PM<sub>2.5</sub> at Residential  
 1060 Homes in Guangzhou, China. *Aerosol and Air Quality Research*, 12, 902-910,  
 1061 <https://doi.org/10.4209/aaqr.2012.02.0026>, 2012.

1062 Castro, T., Peralta, O., Salcedo, D., Santos, J., Saaverda, M. I., Espinoza, M. L., Salcido, A.,  
 1063 Celada-Murillo, A.-T., Carreón-Sierra, S. & Álvarez-Ospina, H.: Water-soluble inorganic  
 1064 ions of size-differentiated atmospheric particles from a suburban site of Mexico City. *J.*  
 1065 *Atmos. Chem.*, 75, 155-169. <https://doi.org/10.1007/s10874-017-9369-5>, 2018.

1066 Chiapello, I., G. Bergametti, B. Chatenet, P. Bousquet, F. Dulac, and E. Santos Soares.:  
 1067 “Origins of African Dust Transported over the Northeastern Tropical Atlantic.” *Journal of*  
 1068 *Geophysical Research: Atmospheres*, 102 (D12), 13701–9.  
 1069 <https://doi.org/10.1029/97JD00259>, 1997.

1070 Chiloane, K. E., Beukes, J. P., Van Zyl, P. G., Maritz, P., Vakkari, V., Josipovic, M., Venter,  
 1071 A. D., Jaars, K., Tiitta, P., Kulmala, M., Wiedensohler, A, Liousse, C., Mkhathswa, G. V.,  
 1072 Ramandh, A., and Laakso, L.: “Spatial, Temporal and Source Contribution Assessments of  
 1073 Black Carbon over the Northern Interior of South Africa.” *Atmos. Chem. Phys.*, 17 (10),  
 1074 6177–96. <https://doi.org/10.5194/acp-17-6177-2017>, 2017.

1075 Conradie, E. H., Van Zyl, P. G., Pienaar, J. J., Beukes, J. P., Galy-Lacaux, C., Venter, A. D.  
 1076 and Mkhathswa, G. V.: The chemical composition and fluxes of atmospheric wet deposition  
 1077 at four sites in South Africa. *Atmos. Environ.*, 146, 113–131,  
 1078 <https://doi.org/10.1016/j.atmosenv.2016.07.033>, 2016.

1079 DEA, Department of Environmental Affairs: National Environmental Management: Air  
 1080 Quality Act, 2004 (ACT NO. 39 OF 2004) National ambient air quality standards,  
 1081 Government Gazette, Pretoria, South Africa, 24 December 2009, 6–9, 2009.

1082 Djossou, J., Léon, J.-F., Akpo, A. B., Liousse, C., Yoboué, V., Bedou, M., Bodjrenou, M.,  
 1083 Chiron, C., Galy-Lacaux, C., Gardrat, E., Abbey, M., Keita, S., Bahino, J., Touré N’Datchoh,  
 1084 E., Ossouhou, M. and Awanou, C. N.: Mass concentration, optical depth and carbon  
 1085 composition of particulate matter in the major southern West African cities of Cotonou  
 1086 (Benin) and Abidjan (Côte d’Ivoire). *Atmos. Chem. Phys.*, 18 (9), 6275-6291,  
 1087 <https://doi.org/10.5194/acp-18-6275-2018>, 2018.

1088 Doumbia, E. T.: Physico-chemical characterization of urban atmospheric pollution in West  
 1089 Africa and health impact study, PhD Thesis, Atmospheric and Oceanic Physics, Université  
 1090 Paul Sabatier, Toulouse III, 2012.

1091 ECAQ, European Commission on Air Quality: Air Quality Standards, Directive 2008/50/EC  
 1092 adopted on 21 May 2008, last updated: September 2019, available at: [http://ec.europa.eu/](http://ec.europa.eu/environment/air/quality/standards.htm)  
 1093 [environment/air/quality/standards.htm](http://ec.europa.eu/environment/air/quality/standards.htm) (last access: 06 November 2021), 2008.

1094 Fernandez, A., Singh, A. and Jaffé, R.: A literature review on trace metals and organic  
 1095 compounds of anthropogenic origin in the Wider Caribbean Region. Marine Pollution  
 1096 Bulletin, 54. 1681-1691, <https://doi.org/10.1016/j.marpolbul.2007.08.007>, 2007.

1097 Guinot, B., Cachier, H. and Oikonomou, K.: Geochemical perspectives from a new aerosol  
 1098 chemical mass closure. Atmos. Chem. Phys., 7, 1657–1670, [https://doi.org/10.5194/acp-7-](https://doi.org/10.5194/acp-7-1657-1196-2007)  
 1099 [1657-1196-2007](https://doi.org/10.5194/acp-7-1657-1196-2007), 2007.

1100 Gawhane, R. D., Rao, P. S. P., Budhavant, K. B., Waghmare, V., Meshram, D. C. & Safai, P.  
 1101 D.: Seasonal variation of chemical composition and source apportionment of PM<sub>2.5</sub> in Pune,  
 1102 India. Environmental Science and Pollution Research, 24, 21065-21072.  
 1103 <https://doi.org/10.1007/s11356-017-9761-3>, 2017.

1104 Ibrahim, A. S. & Habbani, F. I.: Black Carbon Aerosols Impact of Khartoum Petroleum  
 1105 Refinery at Khartoum State. Sudan Journal of Science, 5, 69-83, 2013.

1106 Joseph, A. E., Unnikrishnan, S., and Kumar, R.: Chemical Characterization and Mass Closure  
 1107 of Fine Aerosol for Different Land Use Patterns in Mumbai City. Aerosol and Air Quality  
 1108 Research, 12, 61-72, <https://doi.org/10.4209/aaqr.2011.04.0049>, 2012.

1109 Josipovic, M., Leal-Liousee, C., Crobeddu, B., Baeza-Squiban, A., Segakweng C.K., Galy-  
 1110 Lacaux, C., Beukes, J.P., Van Zyl, P.G. and Fourie, G.: Aerosol characterisation including  
 1111 oxidative potential as a proxy of health impact: A case of a residential site in a highly  
 1112 industrialised area. Clean Air Journal, 29, <https://doi.org/10.17159/caj/2019/29/2.7517>, 2019.

1113 Keita, S., Liousse, C., Yoboué, V., Dominutti, P., Guinot, B., Assamoi, E.-M., Borbon, A.,  
 1114 Haslett, S. L., Bouvier, L., Colomb, A., Coe, H., Akpo, A., Adon, J., Bahino, J., Doumbia,  
 1115 M., Djossou, J., Galy-Lacaux, C., Gardrat, E., Gnamien, S., Léon, J. F., Ossohou, M.,  
 1116 N&#x2013;Datchoh, E. T. and Roblou, L.: Particle and VOC emission factor

1117 measurements for anthropogenic sources in West Africa. *Atmos. Chem. Phys.*, 18 (10),  
 1118 7691–7708, <https://doi.org/10.5194/acp-18-7691-2018>, 2018.

1119 Kgabi, N. A.: Monitoring the levels of toxic metals of atmospheric particulate matter in the  
 1120 Rustenburg district, MSc Thesis, North-West University, Potchefstroom, South Africa, 2006.

1121 Kleynhans, E. H.: Spatial and temporal distribution of trace elements in aerosols in the Vaal  
 1122 triangle, MSc thesis, North-West University, Potchefstroom, South Africa, 2008.

1123 Kulmala, M., Alekseychik, P., Paramonov, M., Laurila, T., Asmi, E., Almut Arneth, A.,  
 1124 Zilitinkevich, S., and Kerminen V-M.: “On Measurements of Aerosol Particles and  
 1125 Greenhouse Gases in Siberia and Future Research Needs.” *Boreal Environment Research*, 16  
 1126 (4), 337–62, 2011

1127 Kumar, S. & Raman, R. S.: Inorganic ions in ambient fine particles over a National Park in  
 1128 central India: Seasonality, dependencies between  $\text{SO}_4^{2-}$ ,  $\text{NO}_3^-$ , and  $\text{NH}_4^+$ , and neutralization  
 1129 of aerosol acidity. *Atmos. Environ.*, 143, 152-163.  
 1130 <http://dx.doi.org/10.1016/j.atmosenv.2016.08.037>, 2016.

1131 Laakso, L., Vakkari, V., Virkkula, A., Laakso, H., Backman, J., Kulmala, M., Beukes, J. P.,  
 1132 van Zyl, P. G., Tiitta, P., Josipovic, M., Pienaar, J. J., Chiloane, K., Gilardoni, S., Vignati, E.,  
 1133 Wiedensohler, A., Tuch, T., Birmili, W., Piketh, S., Collett, K., Fourie, G. D., Komppula, M.,  
 1134 Lihavainen, H., de Leeuw, G., and Kerminen, V.-M., South African EUCAARI  
 1135 measurements: seasonal variation of trace gases and aerosol optical properties. *Atmos. Chem.*  
 1136 *Phys.*, 12, 1847–1864, <https://doi.org/10.5194/acp-12-1847-2012>, 2012.

1137 Laban, Tracey Leah, Pieter Gideon van Zyl, Johan Paul Beukes, Ville Vakkari, Kerneels  
 1138 Jaars, Nadine Borduas-Dedekind, Miroslav Josipovic, Anne Mee Thompson, Markku  
 1139 Kulmala, and Lauri Laakso.: “Seasonal Influences on Surface Ozone Variability in  
 1140 Continental South Africa and Implications for Air Quality.” *Atmos. Chem. Phys.*, 18 (20),  
 1141 15491–514. <https://doi.org/10.5194/acp-18-15491-2018>, 2018.

1142

1143 Langerman, Kristy E., Stuart J. Piketh, Christiaan J. Pauw, and Hendrik J. Smith.: Moving  
 1144 Households to Cleaner Energy through Air Quality Offsets. IEEE, 2018.

1145 Language, B., S. J. Piketh, B. Wernecke, and R. Burger.: “Household Air Pollution in South  
 1146 African Low-Income Settlements: A Case Study.” WIT Transactions on Ecology and The  
 1147 Environment , 207, 227–236. Crete, Greece, 2016.

1148 Marinoni, A., Laj, P., Deveaux, P., Marino, F., Ghermandi, G., Aulagnier, F., and Cachier,  
 1149 H.: Physicochemical properties of fine aerosols at Pland’Aups during ESCOMPTE. Atmos.  
 1150 Res., 74, 565–580, 2005.

1151 Meng, C. C., Wang, L. T., Zhang, F. F., Wei, Z., Ma, S. M., Ma, X. and Yang, J.:  
 1152 Characteristics of concentrations and water-soluble inorganic ions in PM<sub>2.5</sub> in Handan City,  
 1153 Hebei province, China. Atmospheric Research, 171, 133-146.  
 1154 <https://doi.org/10.1016/j.atmosres.2015.12.013>, 2016.

1155 Mouli, P. C., Mohan, S. V., Balaram, V., Kumar, M. V., and Reddy, S. J.: A study on trace  
 1156 elemental composition of atmospheric aerosols at a semi-arid urban site using ICP-MS  
 1157 technique. Atmos. Environ., 40, 136–146, 2006.

1158 Mphepya, J. N., J. J. Pienaar, C. Galy-Lacaux, G. Held, and C. R. Turner.: “Precipitation  
 1159 Chemistry in Semi-Arid Areas of Southern Africa: A Case Study of a Rural and an Industrial  
 1160 Site.” J. Atmos. Chem. 47 (1), 1–24. <https://doi.org/10.1023/B:JOCH.0000012240.09119.c4>,  
 1161 2004.

1162 National Institute for Communicable Diseases Annual Review 2017/18

1163 Niu, J., Rasmussen, P. E., Wheeler, A., Williams, R., and Chénier, M.: Evaluation of airborne  
 1164 particulate matter and metals data in personal, indoor and outdoor environments using ED-  
 1165 XRF and ICP-MS and co-located duplicate samples. Atmos. Environ., 44, 235–245,  
 1166 <https://doi.org/10.1016/j.atmosenv.2009.10.009>, 2010.

1167 Ostro, B., Feng, W.-Y., Broadwin, R., Green, S. and Lipsett, M.: The effects of components  
 1168 of fine particulate air pollution on mortality in California: results from CALFINE.  
 1169 Environmental Health Perspectives, 115, 13-19. <https://doi.org/10.1289/ehp.9281>, 2006.

1170 Ouafu-Leumbe, M.,-R., Galy-Lacaux, C., Liousse, C., Pont, V., Akpo, A., Doumbia, T.,  
 1171 Gardrat, E., Zouiten, C., Sigha-Nkamdjou, L. and Ekodeck, G. E.: Chemical composition and  
 1172 sources of atmospheric aerosols at Djougou (Benin). Meteorol. Atmos. Phys., 130, 591–609,  
 1173 <https://doi.org/10.1007/s00703-017-0538-5>, 2017.

1174 Pacyna, J. M.: Source inventories for atmospheric trace metals, *Atmospheric Particles*,  
 1175 IUPAC Series on Analytical and Physical Chemistry of Environmental Systems, edited by  
 1176 Harrison, R. M. and Van Grieken, R. E., Vol. 5, Wiley, Chichester, UK, 385–423, 1998.

1177 Pacyna, J. M. and Pacyna, E. G.: An assessment of global and regional emissions of trace  
 1178 metals to the atmosphere from anthropogenic sources worldwide. *Environ. Rev.*, 9, 269–298,  
 1179 2001.

1180 Pathak, R.K., Wang, T., Ho, K.F., Lee, S.C.: Characteristics of summertime PM<sub>2.5</sub> organic  
 1181 and elemental carbon in four major Chinese cities: implications of high acidity for water-  
 1182 soluble organic carbon (WSOC). *Atmos. Environ.* 45, 318–325,  
 1183 <https://doi.org/10.1016/j.atmosenv.2010.10.021>, 2011.

1184 Pettijohn, F.J.: *Sedimentary Rocks*. 2nd Edition, Harper and Row Publishers, New York, 628  
 1185 p., 1975.

1186 Polidori, A., Cheung, K. L., Arhami, M., Delfino, R. J., Schauer, J. J., and Sioutas, C.:  
 1187 Relationships between size-fractionated indoor and outdoor trace elements at four retirement  
 1188 communities in southern California. *Atmos. Chem. Phys.*, 9, 4521–4536,  
 1189 <https://doi:10.5194/acp-9-4521-2009>, 2009.

1190 Pope, C.A., III, and Dockery, D.W.: Health Effects of Fine Particulate Air Pollution: Lines  
 1191 that Connect. *Journal of Air & Waste Management Association*. 56, 709-742,  
 1192 <https://doi.org/10.1080/10473289.2006.10464485>, 2006.

1193 Pöschl, U.: Atmospheric Aerosols: Composition, Transformation, Climate and Health  
 1194 Effects. *Angewandte Chemie International Edition*. 44, 7520-7540,  
 1195 <https://doi.org?10.1002/anie.200501122>, 2005.

1196 Qiu, X., Duan, L., Gao, J., Wang, S., Chai, F., Hu, J., Zhang, J. & Yun, Y.: Chemical  
 1197 composition and source apportionment of PM<sub>10</sub> and PM<sub>2.5</sub> in different functional areas of  
 1198 Lanzhou, China. *J. Environ. Sci.*, 40, 75-83. <https://doi.org/10.1016/j.jes.2015.10.021>, 2016.

1199 Rivas, I., Vianna, M., Moreno, T., Pandolfi, M., Amato, F., Reche, C., Bouso, L., Álvarez-  
 1200 Pedrerol, M., Alastuey, A., Sunyer, J., and Querol, X.: Child exposure to indoor air pollutants  
 1201 in schools in Barcelona, Spain. *Environmental International*, 69, 200-212.  
 1202 <http://dx.doi.org/10.1016/j.envint.2014.04.009>, 2014.

1203 Sciare, J., Oikonomou, K., Cachier, H., Mihalopoulos, N., Andreae, M.O., Maenhaut, W. and  
 1204 Sarda-Estève, R.: Aerosol mass closure and reconstruction of the light scattering coefficient  
 1205 over the Eastern Mediterranean Sea during the MINOS campaign, *Atmos. Chem. Phys.*, 5,  
 1206 2253-2265, 2005.

1207 Schlesinger, R. B.: The health impact of common inorganic components of fine particulate  
 1208 matter (PM<sub>2.5</sub>) in ambient air: a critical review. *Inhalation Toxicology*, 19, 811-832.  
 1209 <https://doi.org/10.1080/08958370701402382>, 2007.

1210 Seinfeld, J.H. and Pandis, S.N.: *Atmospheric Chemistry and Physics: From Air Pollution to*  
 1211 *Climate Change*. 2nd Ed. Canada: John Wiley & Sons, Inc., 2006.

1212 Shao, P., Tian, H., Sun, Y., Liu, H., Wu, B., Liu, S., Liu, X., Wu, Y., Liang, W. & Wang, Y.:  
 1213 Characterizing remarkable changes of severe haze events and chemical compositions in  
 1214 multi-size airborne particles (PM<sub>1</sub>, PM<sub>2.5</sub> and PM<sub>10</sub>) from January 2013 to 2016–2017 winter  
 1215 in Beijing, China. *Atmos. Environ.*, 189, 133-144.  
 1216 <https://doi.org/10.1016/j.atmosenv.2018.06.038>, 2018.

1217 Sharma, S. K., Choudhary, N., Srivastava, P., Naja, M., Vijayan, N., Kotnala, G., and  
 1218 Mandal, T. K.: Variation of carbonaceous species and trace elements in PM<sub>10</sub> at a mountain  
 1219 site in the central Himalayan region of India. *J. Atmos. Chem.*, 77, 49-62,  
 1220 <https://doi.org/10.1007/s10874-020-09402-9>, 2020.

1221 South African Country Report. (SEPTEMBER 2005) FOURTEENTH SESSION OF THE  
 1222 UNITED NATIONS COMMISSION ON SUSTAINABLE DEVELOPMENT. Department  
 1223 of Environmental Affairs and Tourism.

1224 Szigeti, T., Óvári, M., Dunster, C., Kelly, F. J., Lucarelli, F. & Zárny, G.: Changes in  
 1225 chemical composition and oxidative potential of urban PM<sub>2.5</sub> between 2010 and 2013 in  
 1226 Hungary. *Science of the Total Environment*, 518, 534-544.  
 1227 <http://dx.doi.org/10.1016/j.scitotenv.2015.03.025>, 2015.

1228 Tanner, R. L., Leadarer, B. P. and Spengler, J. D.: Acidity of atmospheric aerosols. *Environ.*  
 1229 *Sci. Technol.*, 5, 1150-1153, <https://doi.org/10.1021/es00092a003>, 1981.

1230 Terzi, E., Argyropoulos, G., Bougatioti, A., Mihalopoulos, N., Nikolaou, K. and Samara, C.:  
 1231 Chemical composition and mass closure of ambient PM<sub>10</sub> at urban sites. *Atmos. Environ.*, 44  
 1232 (18), 2231-2239, <https://doi.org/10.1016/j.atmosenv.2010.02.019>, 2010.



1233 Tiitta, P., Vakkari, V., Croteau, P., Beukes, J. P., van Zyl, P. G., Josipovic, M., Venter, A. D.,  
 1234 Jaars, K., Pienaar, J. J., Ng, N.L., Canagaratna, M. R., Jayne, J. T., Kerminen, V.-M.,  
 1235 Kokkola, H., Kulmala, M., Laaksonen, A., Worsnop, D. R., and Laakso, L.: Chemical  
 1236 composition, main sources and temporal variability of PM<sub>1</sub> aerosols in southern African  
 1237 grassland. *Atmos. Chem. Phys.*, 14, 1909–1927, <https://doi.org/10.5194/acp-14-1909-2014>, 2014.

1238 Val, S., Liousse, C., Doumbia, E. H. T., Galy-Lacaux, C., Cachier, H., Marchand, N., Badel,  
 1239 A., Gardrat, E., Sylvestre, A. and Baeza-Squiban, A.: Physico-chemical characterization of  
 1240 African urban aerosols (Bamako in Mali and Dakar in Senegal) and their toxic effects in  
 1241 human bronchial epithelial cells: description of a worrying situation. *Particle Fibre*  
 1242 *Toxicology*, 10, 10, <https://doi.org/10.1186/1743-8977-10-10>, 2013.

1243 Vakkari, V., O’connor, E.J., Nisantzi, A., Mamouri, R.E., Hadjimitsis, D.G.: Low-level  
 1244 mixing height detection in coastal locations with a scanning Doppler lidar. *Atmos. Meas.*  
 1245 *Tech.* 8, 1875–1885, <https://doi.org/10.5194/amt-8-1875-2015>, 2015.

1246 Vakkari, V., Tiitta, P., Jaars, K., Croteau, P., Beukes, Venter, A.D., Van Zyl, P.G., Beukes,  
 1247 J.P., Jaars, K., Josipovic, M., Booyens, W., Hendriks, J., Vakkari, V. and Laakso, L.:  
 1248 Measurement of atmospheric trace metals at a regional background site (Welgegund) in  
 1249 South Africa. *Atmos. Chem. Phys.* 17, 4251–4263, [https://doi.org/10.5194/acp-17-4251-](https://doi.org/10.5194/acp-17-4251-2017)  
 1250 [2017](https://doi.org/10.5194/acp-17-4251-2017), 2017.

1251 Van der Walt, A.J., Fitchett, J.M.: Statistical classification of South African seasonal  
 1252 divisions on the basis of daily temperature data. *S. Afr. J. Sci.* 116, 1-15,  
 1253 <https://doi.org/10.17159/sajs.2020/7614>, 2020.

1254 Van Zyl, P. G., Beukes, J. P., Du Toit, G., Mabaso, D., Hendriks, J., Vakkari, V., Tiitta, P.,  
 1255 Pienaar, J. J., Kulmala, M., and Laakso, L.: Assessment of atmospheric trace metals in the  
 1256 western Bushveld Igneous Complex, South Africa. *S. Afr. J. Sci.*, 110, 11,  
 1257 <https://doi.org/10.1590/sajs.2014/20130280>, 2014.

1258 Venter, A.D., Van Zyl, P.G., Beukes, J.P., Swartz, J., Miroslav Josipovic, M., Vakkari, V.,  
 1259 Laakso, L. and Kulmala, M.: Size-resolved characteristics of inorganic ionic species in  
 1260 atmospheric aerosols at a regional background site on the South African Highveld. *Atmos.*  
 1261 *Chem.* 75, 285–304, <https://doi.org/10.1007/s10874-018-9378-z>, 2018.



1262 World Health Organization (WHO): Air quality guidelines – global update 2005, available at:  
 1263 [http://www.who.int/phe/health\\_topics/outdoorair/outdoorair\\_aqg/en/](http://www.who.int/phe/health_topics/outdoorair/outdoorair_aqg/en/) (last access: 06  
 1264 November 2021), 2005.

1265 Xiu, G., Wu, X., Wang, L., Chen, Y., Yu, Y., Xu, F. and Wu, L.: Characterization of  
 1266 Particulate Matter, Ions and OC/EC in a Museum in Shanghai, China. *Aerosol Air Qual. Res.*,  
 1267 15(4), 1240–1250, doi:10.4209/aaqr.2014.07.0147, 2015.

1268 Xu, J., Tai, X., Betha, R., He, J. & Balasubramanian, R.: Comparison of physical and  
 1269 chemical properties of ambient aerosols during the 2009 haze and non-haze periods in  
 1270 Southeast Asia. *Environmental Geochemistry and Health*, 37, 831-841.  
 1271 <https://doi.org/10.1007/s10653-014-9667-7>, 2015.

1272 Xulu, Nopasika A., Stuart J. Piketh, Gregor T. Feig, Daniel A. Lack, and Rebecca M.  
 1273 Garland.: “Characterizing Light-Absorbing Aerosols in a Low-Income Settlement in South  
 1274 Africa.” *Aerosol and Air Quality Research*, 20 (8), 1812–32.  
 1275 <https://doi.org/10.4209/aaqr.2019.09.0443>, 2020.

1276 Zhang, Q.I., Jimenez, J.L., Worsnop, D.R., Canagaratna, M.: A case study of urban particle  
 1277 acidity and its influence on secondary organic aerosol. *Environ. Sci., Technol.*, 41, 3213–  
 1278 3219, <https://doi.org/10.1021/es061812j>, 2007.

1279

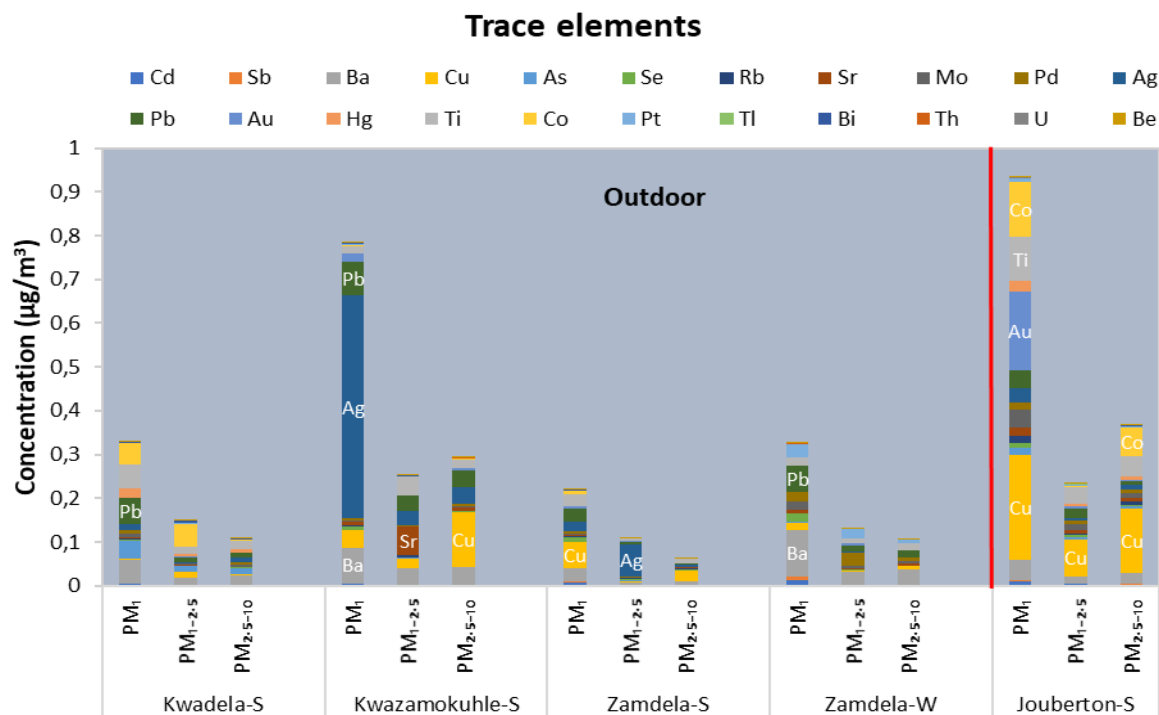

**Figure A1:** Mean concentrations of trace element species for which significantly lower levels were determined in PM<sub>1</sub>, PM<sub>1-2.5</sub> and PM<sub>2.5-10</sub> at each site during respective sampling campaigns
